# Supplementary material for: Reaction pathways and free energy profiles for spontaneous hydrolysis of urea and tetramethylurea: unexpected substituent effects
Source: Royal Society of Chemistry journal article supplement (doi:10.1039/c3ob41055b), 2013-01-01
Supplement: c3ob41055b.pdf [file c3ob41055b.pdf]

## **Supplementary Information for**

### **Reaction pathways and free energy profiles for spontaneous hydrolysis of urea and tetramethylurea: Unexpected substituent effects**

Min Yao,<sup>1,3</sup> Wenlong Tu,<sup>1</sup> Xi Chen,<sup>2,3\*</sup> and Chang-Guo Zhan<sup>3,\*</sup>

<sup>1</sup>*Key Laboratory of Pesticide and Chemical Biology of Ministry of Education, College of Chemistry, Central China Normal University, Wuhan 430079, People's Republic of China,*

<sup>2</sup>*College of Chemistry and Material Science, South-Central University for Nationalities,*

*Wuhan 430074, P. R. China, and* <sup>3</sup>*Department of Pharmaceutical Sciences, College of Pharmacy, University of Kentucky, 789 South Limestone Street, Lexington, KY 40536*

#### **Table of Contents**

1. Cartesian coordinates and energies of Geometries in **Figure 1**
2. Cartesian coordinates and energies of Geometries in **Figure 2**
3. Cartesian coordinates and energies of Geometries in **Figure 3**
4. Cartesian coordinates and energies of Geometries in **Figure 5**
5. Cartesian coordinates and energies of Geometries in **Figure 6**
6. **Table S1.** Calculated Gibbs free energy barriers (in kcal/mol) for various reaction pathways of the hydrolysis of urea and Me<sub>4</sub>U in both the gas phase and aqueous solution at 298.15 K.
7. **Table S2.** Imaginary vibrational frequencies for the rate-determining transition states, tunneling factor (transmission coefficient), and rate constants for urea and Me<sub>4</sub>U hydrolysis at 298.15 K.

### Urea(H<sub>2</sub>O) of SR-a in Figure 1:

Standard orientation:

| Center<br>Number | Atomic<br>Number | Atomic<br>Type | Coordinates (Angstroms) |           |           |
|------------------|------------------|----------------|-------------------------|-----------|-----------|
|                  |                  |                | X                       | Y         | Z         |
| 1                | 6                | 0              | -0.704535               | -0.076393 | -0.012119 |
| 2                | 8                | 0              | -0.021846               | -1.107335 | -0.059090 |
| 3                | 7                | 0              | -2.080275               | -0.130962 | 0.123965  |
| 4                | 1                | 0              | -2.635737               | 0.630697  | -0.244544 |
| 5                | 8                | 0              | 2.510840                | 0.016829  | -0.037491 |
| 6                | 1                | 0              | 1.790846                | -0.655126 | -0.053184 |
| 7                | 1                | 0              | 3.152964                | -0.281113 | 0.622635  |
| 8                | 1                | 0              | -2.468733               | -1.051956 | -0.033628 |
| 9                | 7                | 0              | -0.162277               | 1.180553  | -0.083627 |
| 10               | 1                | 0              | -0.679520               | 1.970214  | 0.277684  |
| 11               | 1                | 0              | 0.853302                | 1.222554  | -0.005964 |

B3LYP/6-31+G\* energy: -301.658788 Hartree

Zero-point vibrational energy: 0.088625 Hartree

Thermal correction to Gibbs free energy: 0.058132 Hartree

B3LYP/6-31++G\*\*//B3LYP/6-31+G\* energy: -301.7418316 Hartree

B3LYP/6-311++G\*\*//B3LYP/6-31+G\* energy: -301.8231799 Hartree

B3LYP/aug-cc-pVDZ//B3LYP/6-31+G\* energy: -301.770713 Hartree

B3LYP/aug-cc-pVTZ //B3LYP/6-31+G\* energy: -301.8498415 Hartree

MP2/6-31+G\* //B3LYP/6-31+G\* energy: -300.855515 Hartree

MP2/6-31++G\*\* //B3LYP/6-31+G\* energy: -300.9163744 Hartree

MP2/6-311++G\*\* //B3LYP/6-31+G\* energy: -301.0460054 Hartree

MP2/6-311++G(2d,2p)//B3LYP/6-31+G\* energy: -301.1217937 Hartree

MP2/aug-cc-pVDZ //B3LYP/6-31+G\* energy: -300.9919506 Hartree

MP2/aug-cc-pVTZ //B3LYP/6-31+G\* energy: -301.2552013 Hartree

MP2/aug-cc-pVQZ //B3LYP/6-31+G\* energy: -301.3422227 Hartree

MP2/CBS //B3LYP/6-31+G(d) energy: -301.3919361 Hartree

CCSD(T)/6-31++G\*\*// B3LYP /6-31+G\* energy: -300.9699271 Hartree

CCSD(T)/aug-cc-pVDZ// B3LYP /6-31+G\* energy: -301.0513669 Hartree

Solvent shift (FPCM/0.001 au contour): -0.026208826 Hartree

### OH(H<sub>2</sub>O)<sub>3</sub> of SR-a in Figure 1:

Standard orientation:

| Center<br>Number | Atomic<br>Number | Atomic<br>Type | Coordinates (Angstroms) |   |   |
|------------------|------------------|----------------|-------------------------|---|---|
|                  |                  |                | X                       | Y | Z |

|    |   |   |           |           |           |
|----|---|---|-----------|-----------|-----------|
| 1  | 8 | 0 | -0.001590 | -0.001083 | 0.735230  |
| 2  | 1 | 0 | -0.002094 | -0.003006 | 1.703932  |
| 3  | 8 | 0 | 1.616780  | -1.855569 | -0.244956 |
| 4  | 1 | 0 | 1.046296  | -1.123472 | 0.177749  |
| 5  | 1 | 0 | 0.965452  | -2.367795 | -0.746417 |
| 6  | 8 | 0 | -2.419773 | -0.467475 | -0.245370 |
| 7  | 1 | 0 | -2.529925 | 0.352598  | -0.748788 |
| 8  | 1 | 0 | -1.499592 | -0.346678 | 0.176335  |
| 9  | 8 | 0 | 0.804171  | 2.325149  | -0.244374 |
| 10 | 1 | 0 | 1.571457  | 2.012932  | -0.746324 |
| 11 | 1 | 0 | 0.451709  | 1.467239  | 0.179276  |

-----  
B3LYP/6-31+G\* energy: -305.136485 Hartree

Zero-point vibrational energy: 0.082737 Hartree

Thermal correction to Gibbs free energy: 0.046521 Hartree

B3LYP/6-31++G\*\*//B3LYP/6-31+G\* energy: -305.2232863 Hartree

B3LYP/6-311++G\*\*//B3LYP/6-31+G\* energy: -305.3178539 Hartree

B3LYP/aug-cc-pVDZ//B3LYP/6-31+G\* energy: -305.2585016 Hartree

B3LYP/ aug-cc-pVTZ //B3LYP/6-31+G\* energy: -305.3408226 Hartree

MP2/6-31+G\* //B3LYP/6-31+G\* energy: -304.335055 Hartree

MP2/6-31++G\*\* //B3LYP/6-31+G\* energy: -304.4179181 Hartree

MP2/6-311++G\*\* //B3LYP/6-31+G\* energy: -304.5780106 Hartree

MP2/6-311++G(2d,2p)//B3LYP/6-31+G\* energy: -304.6640567 Hartree

MP2/aug-cc-pVDZ //B3LYP/6-31+G\* energy: -304.5277586 Hartree

MP2/aug-cc-pVTZ //B3LYP/6-31+G\* energy: -304.7972153 Hartree

MP2/aug-cc-pVQZ //B3LYP/6-31+G\* energy: -304.8876915 Hartree

MP2/CBS //B3LYP/6-31+G(d) energy: -304.9395266 Hartree

CCSD(T)/6-31++G\*\*// B3LYP /6-31+G\* energy: -304.4565969 Hartree

CCSD(T)/aug-cc-pVDZ// B3LYP /6-31+G\* energy: -304.5745667 Hartree

Solvent shift (FPCM/0.001 au contour): -0.102735477 Hartree

### TS1-a in Figure 1:

Standard orientation:

-----

| Center<br>Number | Atomic<br>Number | Atomic<br>Type | Coordinates (Angstroms) |           |           |
|------------------|------------------|----------------|-------------------------|-----------|-----------|
|                  |                  |                | X                       | Y         | Z         |
| 1                | 6                | 0              | -0.395045               | -0.723671 | 0.537279  |
| 2                | 8                | 0              | 0.872627                | -0.769629 | 0.532861  |
| 3                | 7                | 0              | -1.039455               | 0.103391  | 1.498391  |
| 4                | 1                | 0              | -2.028358               | 0.208951  | 1.272067  |
| 5                | 8                | 0              | -0.949203               | 0.257856  | -1.009981 |
| 6                | 1                | 0              | -0.558088               | -0.261205 | -1.730663 |

-----

|    |   |   |           |           |           |
|----|---|---|-----------|-----------|-----------|
| 7  | 1 | 0 | -0.618598 | 1.032529  | 1.470207  |
| 8  | 8 | 0 | 2.609712  | 1.242883  | 0.388865  |
| 9  | 1 | 0 | 2.967856  | 1.393965  | 1.275550  |
| 10 | 1 | 0 | 1.912077  | 0.531107  | 0.510195  |
| 11 | 8 | 0 | 3.162557  | -1.508386 | -0.962784 |
| 12 | 1 | 0 | 3.416221  | -0.583332 | -0.800274 |
| 13 | 1 | 0 | 2.271102  | -1.538498 | -0.551602 |
| 14 | 8 | 0 | -3.530780 | 0.037190  | -0.596230 |
| 15 | 1 | 0 | -2.561891 | 0.122804  | -0.892686 |
| 16 | 1 | 0 | -3.904129 | 0.921734  | -0.719107 |
| 17 | 8 | 0 | 0.112521  | 2.700864  | -0.282022 |
| 18 | 1 | 0 | -0.282985 | 1.876584  | -0.672225 |
| 19 | 1 | 0 | 1.047087  | 2.457612  | -0.140205 |
| 20 | 7 | 0 | -1.070544 | -1.947940 | 0.222386  |
| 21 | 1 | 0 | -2.075224 | -1.895004 | 0.370340  |
| 22 | 1 | 0 | -0.664287 | -2.699605 | 0.773627  |

-----  
B3LYP/6-31+G\* energy: - 606.760621 Hartree

Zero-point vibrational energy: 0.176210 Hartree

Thermal correction to Gibbs free energy: 0.131381 Hartree

B3LYP/6-31++G\*\*//B3LYP/6-31+G\* energy: -606.9546999 Hartree

B3LYP/6-311++G\*\*//B3LYP/6-31+G\* energy: -607.1303032 Hartree

B3LYP/aug-cc-pVDZ//B3LYP/6-31+G\* energy: -607.0173909 Hartree

B3LYP/ aug-cc-pVTZ //B3LYP/6-31+G\* energy: -607.1761303 Hartree

MP2/6-31+G\* //B3LYP/6-31+G\* energy: -605.194225 Hartree

MP2/6-31++G\*\* //B3LYP/6-31+G\* energy: -605.335673 Hartree

MP2/6-311++G\*\* //B3LYP/6-31+G\* energy: -605.6246481 Hartree

MP2/6-311++G(2d,2p)//B3LYP/6-31+G\* energy: -605.7850426 Hartree

MP2/aug-cc-pVDZ //B3LYP/6-31+G\* energy: -605.5217118 Hartree

MP2/aug-cc-pVTZ //B3LYP/6-31+G\* energy: -606.0519675 Hartree

MP2/aug-cc-pVQZ //B3LYP/6-31+G\* energy: -606.2277706 Hartree

MP2/CBS //B3LYP/6-31+G(d) energy: -606.3282596 Hartree

CCSD(T)/6-31++G\*\*// B3LYP /6-31+G\* energy: -605.4308826 Hartree

CCSD(T)/aug-cc-pVDZ// B3LYP /6-31+G\* energy: -605.6307329 Hartree

Solvent shift (FPCM/0.001 au contour): -0.098589853 Hartree

### INT-a in Figure 1:

Standard orientation:

| Center<br>Number | Atomic<br>Number | Atomic<br>Type | Coordinates (Angstroms) |           |          |
|------------------|------------------|----------------|-------------------------|-----------|----------|
|                  |                  |                | X                       | Y         | Z        |
| 1                | 6                | 0              | -0.040094               | -0.633192 | 0.546978 |
| 2                | 8                | 0              | -1.273216               | -0.140543 | 0.607633 |

|    |   |   |           |           |           |
|----|---|---|-----------|-----------|-----------|
| 3  | 7 | 0 | 0.552800  | -0.682613 | -0.831568 |
| 4  | 1 | 0 | -0.106018 | -1.190865 | -1.426041 |
| 5  | 8 | 0 | 0.862492  | 0.215614  | 1.318679  |
| 6  | 1 | 0 | 1.685853  | -0.296249 | 1.402966  |
| 7  | 8 | 0 | -2.861583 | -1.455167 | -1.112485 |
| 8  | 1 | 0 | -2.307295 | -0.991608 | -0.411855 |
| 9  | 1 | 0 | -3.230131 | -0.724597 | -1.630482 |
| 10 | 8 | 0 | -1.729377 | 2.364389  | -0.062311 |
| 11 | 1 | 0 | -1.556859 | 1.392308  | 0.187762  |
| 12 | 1 | 0 | -1.974336 | 2.783946  | 0.775346  |
| 13 | 8 | 0 | 3.402590  | -0.800775 | -0.886197 |
| 14 | 1 | 0 | 3.493017  | 0.158721  | -0.992615 |
| 15 | 1 | 0 | 2.416219  | -0.936208 | -0.890166 |
| 16 | 8 | 0 | 1.110421  | 2.592315  | -0.286209 |
| 17 | 1 | 0 | 0.139096  | 2.730143  | -0.339882 |
| 18 | 1 | 0 | 1.174457  | 1.868945  | 0.372979  |
| 19 | 1 | 0 | 0.531496  | 0.282537  | -1.170422 |
| 20 | 7 | 0 | 0.110862  | -1.996926 | 1.108758  |
| 21 | 1 | 0 | -0.574911 | -2.053985 | 1.861678  |
| 22 | 1 | 0 | -0.186288 | -2.673830 | 0.405663  |

-----  
B3LYP/6-31+G\* energy: -606.764021 Hartree

Zero-point vibrational energy: 0.177619 Hartree

Thermal correction to Gibbs free energy: 0.132904 Hartree

B3LYP/6-31++G\*\*//B3LYP/6-31+G\* energy: -606.9590285 Hartree

B3LYP/6-311++G\*\*//B3LYP/6-31+G\* energy: -607.1327711 Hartree

B3LYP/aug-cc-pVDZ//B3LYP/6-31+G\* energy: -607.0222513 Hartree

B3LYP/aug-cc-pVTZ //B3LYP/6-31+G\* energy: -607.1797663 Hartree

MP2/6-31+G\*//B3LYP/6-31+G\* energy: -605.2026 Hartree

MP2/6-31++G\*\*//B3LYP/6-31+G\* energy: -605.3437183 Hartree

MP2/6-311++G\*\*//B3LYP/6-31+G\* energy: -605.6334224 Hartree

MP2/6-311++G(2d,2p)//B3LYP/6-31+G\* energy: -605.7926443 Hartree

MP2/aug-cc-pVDZ //B3LYP/6-31+G\* energy: -605.5291594 Hartree

MP2/aug-cc-pVTZ //B3LYP/6-31+G\* energy: -606.0602964 Hartree

MP2/aug-cc-pVQZ //B3LYP/6-31+G\* energy: -606.2361584 Hartree

MP2/CBS //B3LYP/6-31+G(d) energy: -606.3366558 Hartree

CCSD(T)/6-31++G\*\*// B3LYP /6-31+G\* energy: -605.4398944 Hartree

CCSD(T)/aug-cc-pVDZ// B3LYP /6-31+G\* energy: -605.6390958 Hartree

Solvent shift (FPCM/0.001 au contour): -0.09985206 Hartree

### TS2-a in Figure 1:

Standard orientation:

-----  
Center      Atomic      Atomic      Coordinates (Angstroms)

| Number | Number | Type | X         | Y         | Z         |
|--------|--------|------|-----------|-----------|-----------|
| 1      | 6      | 0    | 0.406812  | 0.364364  | -0.561053 |
| 2      | 8      | 0    | -0.849150 | 0.671246  | -0.748557 |
| 3      | 7      | 0    | 0.732352  | 0.261601  | 1.029406  |
| 4      | 1      | 0    | 0.513812  | 1.155504  | 1.472892  |
| 5      | 8      | 0    | 0.772911  | -0.944783 | -0.987751 |
| 6      | 1      | 0    | 1.721030  | -1.058752 | -0.693097 |
| 7      | 8      | 0    | -1.472006 | 2.647078  | 0.957651  |
| 8      | 1      | 0    | -1.296977 | 1.961518  | 0.244116  |
| 9      | 1      | 0    | -2.304097 | 2.359724  | 1.360864  |
| 10     | 8      | 0    | -2.857432 | -1.015989 | -0.434027 |
| 11     | 1      | 0    | -2.092402 | -0.368597 | -0.573256 |
| 12     | 1      | 0    | -3.002725 | -1.405710 | -1.308428 |
| 13     | 8      | 0    | 3.031669  | -0.525174 | 0.472980  |
| 14     | 1      | 0    | 3.499025  | -1.194448 | 0.992897  |
| 15     | 1      | 0    | 1.850374  | -0.081099 | 1.037189  |
| 16     | 8      | 0    | -0.803105 | -2.492408 | 0.868189  |
| 17     | 1      | 0    | -1.668144 | -2.143504 | 0.560463  |
| 18     | 1      | 0    | -0.198867 | -2.193338 | 0.154639  |
| 19     | 1      | 0    | 0.118322  | -0.464405 | 1.414832  |
| 20     | 7      | 0    | 1.339344  | 1.324995  | -1.122468 |
| 21     | 1      | 0    | 1.044780  | 2.268028  | -0.881135 |
| 22     | 1      | 0    | 2.290027  | 1.152951  | -0.792103 |

B3LYP/6-31+G\* energy: -606.748952 Hartree

Zero-point vibrational energy: 0.175918 Hartree

Thermal correction to Gibbs free energy: 0.134266 Hartree

B3LYP/6-31++G\*\*//B3LYP/6-31+G\* energy: -606.9447723 Hartree

B3LYP/6-311++G\*\*//B3LYP/6-31+G\* energy: -607.1173815 Hartree

B3LYP/aug-cc-pVDZ//B3LYP/6-31+G\* energy: -607.0070949 Hartree

B3LYP/aug-cc-pVTZ//B3LYP/6-31+G\* energy: -607.1645655 Hartree

MP2/6-31+G\*\*//B3LYP/6-31+G\* energy: -605.187739 Hartree

MP2/6-31++G\*\* //B3LYP/6-31+G\* energy: -605.3281668 Hartree

MP2/6-311++G\*\* //B3LYP/6-31+G\* energy: -605.6155384 Hartree

MP2/6-311++G(2d,2p)//B3LYP/6-31+G\* energy: -605.7770263 Hartree

MP2/aug-cc-pVDZ //B3LYP/6-31+G\* energy: -605.5154091 Hartree

MP2/aug-cc-pVTZ //B3LYP/6-31+G\* energy: -606.0467482 Hartree

MP2/aug-cc-pVQZ //B3LYP/6-31+G\* energy: -606.2223397 Hartree

MP2/CBS //B3LYP/6-31+G(d) energy: -606.3226476 Hartree

CCSD(T)/6-31++G\*\*// B3LYP /6-31+G\* energy: -605.4214425 Hartree

CCSD(T)/aug-cc-pVDZ// B3LYP /6-31+G\* energy: -605.6225995 Hartree

Solvent shift(FPCM/0.001 au contour): -0.101209686 Hartree

**PC-a in Figure 1:**

Standard orientation:

| Center Number | Atomic Number | Atomic Type | Coordinates (Angstroms) |           |           |
|---------------|---------------|-------------|-------------------------|-----------|-----------|
|               |               |             | X                       | Y         | Z         |
| 1             | 6             | 0           | 0.826777                | -0.576599 | -0.372553 |
| 2             | 8             | 0           | 1.692799                | 0.350045  | -0.231754 |
| 3             | 7             | 0           | -4.017223               | 0.198501  | 1.062011  |
| 4             | 1             | 0           | -4.695743               | 0.236637  | 0.301714  |
| 5             | 8             | 0           | -0.402943               | -0.404590 | -0.631728 |
| 6             | 1             | 0           | -1.493688               | -1.690407 | -0.365121 |
| 7             | 8             | 0           | 4.004041                | -0.605940 | 0.831546  |
| 8             | 1             | 0           | 3.231346                | -0.165083 | 0.380535  |
| 9             | 1             | 0           | 3.998378                | -0.235804 | 1.726208  |
| 10            | 8             | 0           | 1.006062                | 2.993695  | -0.126718 |
| 11            | 1             | 0           | 1.249204                | 2.026474  | -0.133978 |
| 12            | 1             | 0           | 1.085955                | 3.260253  | -1.054183 |
| 13            | 8             | 0           | -2.083573               | -2.479208 | -0.201222 |
| 14            | 1             | 0           | -2.521817               | -2.632640 | -1.050628 |
| 15            | 1             | 0           | -3.516155               | -0.685190 | 0.949758  |
| 16            | 8             | 0           | -1.753448               | 2.034030  | -0.212223 |
| 17            | 1             | 0           | -0.977533               | 2.595174  | -0.013427 |
| 18            | 1             | 0           | -1.326572               | 1.170480  | -0.421056 |
| 19            | 1             | 0           | -3.334937               | 0.937291  | 0.865076  |
| 20            | 7             | 0           | 1.286536                | -1.891164 | -0.272984 |
| 21            | 1             | 0           | 2.173752                | -2.019864 | 0.200885  |
| 22            | 1             | 0           | 0.578444                | -2.593339 | -0.096856 |

B3LYP/6-31+G\* energy: -606.830784 Hartree

Zero-point vibrational energy: 0.175495 Hartree

Thermal correction to Gibbs free energy: 0.124539 Hartree

B3LYP/6-31++G\*\*//B3LYP/6-31+G\* energy: -607.0159644 Hartree

B3LYP/6-311++G\*\*//B3LYP/6-31+G\* energy: -607.1924929 Hartree

B3LYP/aug-cc-pVDZ//B3LYP/6-31+G\* energy: -607.0787501 Hartree

B3LYP/aug-cc-pVTZ//B3LYP/6-31+G\* energy: -607.2396333 Hartree

MP2/6-31+G\*\*//B3LYP/6-31+G\* energy: -605.251338 Hartree

MP2/6-31++G\*\* //B3LYP/6-31+G\* energy: -605.3907138 Hartree

MP2/6-311++G\*\* //B3LYP/6-31+G\* energy: -605.6799955 Hartree

MP2/6-311++G(2d,2p)//B3LYP/6-31+G\* energy: -605.8417192 Hartree

MP2/aug-cc-pVDZ //B3LYP/6-31+G\* energy: -605.5745467 Hartree

MP2/aug-cc-pVTZ //B3LYP/6-31+G\* energy: -606.1083553 Hartree

MP2/aug-cc-pVQZ //B3LYP/6-31+G\* energy: -606.2849787 Hartree  
MP2/CBS //B3LYP/6-31+G(d) energy: -606.3858982 Hartree  
CCSD(T)/6-31++G\*\*// B3LYP /6-31+G\* energy: -605.4862267 Hartree  
CCSD(T)/aug-cc-pVDZ// B3LYP /6-31+G\* energy: -605.6841056 Hartree  
Solvent shift(FPCM/0.001 au contour): -0.091242038 Hartree

**RC-b in Figure 2:**

Standard orientation:

| Center<br>Number | Atomic<br>Number | Atomic<br>Type | Coordinates (Angstroms) |           |           |
|------------------|------------------|----------------|-------------------------|-----------|-----------|
|                  |                  |                | X                       | Y         | Z         |
| 1                | 6                | 0              | -1.265546               | -0.051991 | -0.000330 |
| 2                | 1                | 0              | -3.041874               | -1.009134 | -0.004623 |
| 3                | 7                | 0              | -2.646152               | -0.083720 | -0.106944 |
| 4                | 1                | 0              | -3.188619               | 0.658494  | 0.316022  |
| 5                | 8                | 0              | -0.610774               | -1.104896 | -0.051643 |
| 6                | 7                | 0              | -0.706756               | 1.179875  | 0.145102  |
| 7                | 1                | 0              | -1.254802               | 2.008753  | -0.037762 |
| 8                | 1                | 0              | 0.313208                | 1.278339  | 0.083847  |
| 9                | 1                | 0              | 1.132189                | -1.372852 | -0.060476 |
| 10               | 8                | 0              | 2.122279                | -1.376007 | -0.037380 |
| 11               | 1                | 0              | 2.372725                | -1.912772 | 0.728612  |
| 12               | 1                | 0              | 2.366038                | 0.370085  | 0.023764  |
| 13               | 8                | 0              | 2.200259                | 1.346655  | 0.018935  |
| 14               | 1                | 0              | 2.670650                | 1.691938  | -0.753808 |

B3LYP/6-31+G\* energy: -378.080070 Hartree  
Zero-point vibrational energy: 0.114040 Hartree  
Thermal correction to Gibbs free energy: 0.079467 Hartree  
B3LYP/6-31++G\*\*//B3LYP/6-31+G\* energy: -378.1947923 Hartree  
B3LYP/6-311++G\*\*//B3LYP/6-31+G\* energy: -378.300002 Hartree  
B3LYP/aug-cc-pVDZ//B3LYP/6-31+G\* energy: -378.2319578 Hartree  
B3LYP/ aug-cc-pVTZ //B3LYP/6-31+G\* energy: -378.3320606 Hartree  
MP2/6-31+G\* //B3LYP/6-31+G\* energy: -377.0861281 Hartree  
MP2/6-31++G\*\* //B3LYP/6-31+G\* energy: -377.1688592 Hartree  
MP2/6-311++G\*\* //B3LYP/6-31+G\* energy: -377.3388241 Hartree  
MP2/6-311++G(2d,2p)//B3LYP/6-31+G\* energy: -377.4349826 Hartree  
MP2/aug-cc-pVDZ //B3LYP/6-31+G\* energy: -377.2703507 Hartree  
MP2/aug-cc-pVTZ //B3LYP/6-31+G\* energy: -377.6013515 Hartree  
MP2/aug-cc-pVQZ //B3LYP/6-31+G\* energy: -377.7108145 Hartree  
MP2/CBS //B3LYP/6-31+G(d) energy: -377.7733541 Hartree  
CCSD(T)/6-31++G\*\*// B3LYP /6-31+G\* energy: -377.2332926 Hartree  
CCSD(T)/aug-cc-pVDZ// B3LYP /6-31+G\* energy: -377.3426515 Hartree



Solvent shift(FPCM/0.001 au contour): -0.029329757 Hartree

**TS1-b in Figure 2:**

Standard orientation:

| Center Number | Atomic Number | Atomic Type | Coordinates (Angstroms) |           |           |
|---------------|---------------|-------------|-------------------------|-----------|-----------|
|               |               |             | X                       | Y         | Z         |
| 1             | 6             | 0           | -0.652799               | -0.231075 | -0.193343 |
| 2             | 1             | 0           | -2.027195               | -1.317920 | 0.752821  |
| 3             | 7             | 0           | -1.896102               | -0.384318 | 0.379127  |
| 4             | 1             | 0           | -2.180350               | 0.356405  | 1.019653  |
| 5             | 8             | 0           | 0.035851                | -1.093299 | -0.688931 |
| 6             | 7             | 0           | -0.532352               | 1.198538  | -0.792964 |
| 7             | 1             | 0           | -0.884622               | 1.212140  | -1.753982 |
| 8             | 1             | 0           | 0.470826                | 1.401162  | -0.750631 |
| 9             | 1             | 0           | 1.165553                | -0.582177 | -0.384417 |
| 10            | 8             | 0           | 2.294517                | -0.176283 | 0.060563  |
| 11            | 1             | 0           | 3.165534                | 0.084984  | 0.390690  |
| 12            | 1             | 0           | 1.358192                | 0.343131  | 0.762801  |
| 13            | 8             | 0           | 0.151718                | 0.396611  | 0.943427  |
| 14            | 1             | 0           | -0.008653               | 1.172949  | 1.499513  |

B3LYP/6-31+G\* energy: - 378.005611 Hartree

Zero-point vibrational energy: 0.109005 Hartree

Thermal correction to Gibbs free energy: 0.077424 Hartree

B3LYP/6-31++G\*\*//B3LYP/6-31+G\* energy: -378.1209941 Hartree

B3LYP/6-311++G\*\*//B3LYP/6-31+G\* energy: -378.2226383 Hartree

B3LYP/aug-cc-pVDZ//B3LYP/6-31+G\* energy: -378.1574688 Hartree

B3LYP/ aug-cc-pVTZ //B3LYP/6-31+G\* energy: -378.2552684 Hartree

MP2/6-31+G\* //B3LYP/6-31+G\* energy: -377.0072618 Hartree

MP2/6-31++G\*\* //B3LYP/6-31+G\* energy: -377.0935134 Hartree

MP2/6-311++G\*\* //B3LYP/6-31+G\* energy: -377.2622344 Hartree

MP2/6-311++G(2d,2p)//B3LYP/6-31+G\* energy: -377.3582982 Hartree

MP2/aug-cc-pVDZ //B3LYP/6-31+G\* energy: -377.1979265 Hartree

MP2/aug-cc-pVTZ //B3LYP/6-31+G\* energy: -377.5284171 Hartree

MP2/aug-cc-pVQZ //B3LYP/6-31+G\* energy: -377.636741 Hartree

MP2/CBS //B3LYP/6-31+G(d) energy: -377.6985275 Hartree

CCSD(T)/6-31++G\*\*// B3LYP /6-31+G\* energy: -377.15704 Hartree

CCSD(T)/aug-cc-pVDZ// B3LYP /6-31+G\* energy: -377.269324 Hartree

Solvent shift(FPCM/0.001 au contour): -0.027435262 Hartree

**INT-b in Figure 2:**

Standard orientation:

---

| Center<br>Number | Atomic<br>Number | Atomic<br>Type | Coordinates (Angstroms) |           |           |
|------------------|------------------|----------------|-------------------------|-----------|-----------|
|                  |                  |                | X                       | Y         | Z         |
| 1                | 6                | 0              | 0.677301                | -0.215208 | 0.015563  |
| 2                | 1                | 0              | 1.676044                | -0.249680 | -1.712813 |
| 3                | 7                | 0              | 1.819861                | -0.048453 | -0.730009 |
| 4                | 1                | 0              | 2.301094                | 0.829222  | -0.574608 |
| 5                | 8                | 0              | -0.113769               | -1.179507 | -0.374845 |
| 6                | 7                | 0              | 0.861745                | 0.101422  | 1.386679  |
| 7                | 1                | 0              | 1.692503                | -0.362219 | 1.748483  |
| 8                | 1                | 0              | 0.051180                | -0.176630 | 1.933475  |
| 9                | 1                | 0              | -1.187133               | -0.927848 | -0.131905 |
| 10               | 8                | 0              | -2.257618               | -0.183001 | 0.103267  |
| 11               | 1                | 0              | -2.947420               | -0.301018 | -0.567238 |
| 12               | 1                | 0              | -1.530697               | 0.726218  | -0.176185 |
| 13               | 8                | 0              | -0.455444               | 1.291081  | -0.413755 |
| 14               | 1                | 0              | -0.275969               | 1.953835  | 0.273383  |

---

B3LYP/6-31+G\* energy: - 378.032094 Hartree

Zero-point vibrational energy: 0.116423 Hartree

Thermal correction to Gibbs free energy: 0.084145 Hartree

B3LYP/6-31++G\*\*//B3LYP/6-31+G\* energy: -378.151393 Hartree

B3LYP/6-311++G\*\*//B3LYP/6-31+G\* energy: -378.2543431 Hartree

B3LYP/aug-cc-pVDZ//B3LYP/6-31+G\* energy: -378.1891316 Hartree

B3LYP/aug-cc-pVTZ //B3LYP/6-31+G\* energy: -378.2855477 Hartree

MP2/6-31+G\* //B3LYP/6-31+G\* energy: -377.0500814 Hartree

MP2/6-31++G\*\* //B3LYP/6-31+G\* energy: -377.133643 Hartree

MP2/6-311++G\*\* //B3LYP/6-31+G\* energy: -377.303883 Hartree

MP2/6-311++G(2d,2p)//B3LYP/6-31+G\* energy: -377.3986501 Hartree

MP2/aug-cc-pVDZ //B3LYP/6-31+G\* energy: -377.2356821 Hartree

MP2/aug-cc-pVTZ //B3LYP/6-31+G\* energy: -377.566239 Hartree

MP2/aug-cc-pVQZ //B3LYP/6-31+G\* energy: -377.6752803 Hartree

MP2/CBS //B3LYP/6-31+G(d) energy: -377.737549 Hartree

CCSD(T)/6-31++G\*\*// B3LYP /6-31+G\* energy: -377.20095 Hartree

CCSD(T)/aug-cc-pVDZ// B3LYP /6-31+G\* energy: -377.3105666 Hartree

Solvent shift(FPCM/0.001 au contour): -0.026951084 Hartree

### TS2-b in Figure 2:

Standard orientation:

---

| Center<br>Number | Atomic<br>Number | Atomic<br>Type | Coordinates (Angstroms) |   |   |
|------------------|------------------|----------------|-------------------------|---|---|
|                  |                  |                | X                       | Y | Z |

---

|    |   |   |           |           |           |
|----|---|---|-----------|-----------|-----------|
| 1  | 6 | 0 | 0.570314  | -0.119743 | -0.005851 |
| 2  | 1 | 0 | 1.722359  | -1.769904 | 0.273624  |
| 3  | 7 | 0 | 1.667422  | -0.975923 | -0.358459 |
| 4  | 1 | 0 | 1.536980  | -1.302629 | -1.311353 |
| 5  | 8 | 0 | -0.137160 | -0.634486 | 1.077547  |
| 6  | 7 | 0 | 1.116332  | 1.311886  | 0.375273  |
| 7  | 1 | 0 | 2.127493  | 1.392191  | 0.270286  |
| 8  | 1 | 0 | 0.812484  | 1.634793  | 1.294078  |
| 9  | 1 | 0 | -1.099774 | -0.468296 | 0.926808  |
| 10 | 8 | 0 | -2.604091 | 0.032659  | 0.009552  |
| 11 | 1 | 0 | -3.202635 | -0.644926 | -0.337668 |
| 12 | 1 | 0 | -1.918288 | 0.197010  | -0.686004 |
| 13 | 8 | 0 | -0.165970 | 0.336583  | -1.072935 |
| 14 | 1 | 0 | 0.370982  | 1.450435  | -0.625672 |

-----  
B3LYP/6-31+G\* energy: - 377.990490 Hartree

Zero-point vibrational energy: 0.111123 Hartree

Thermal correction to Gibbs free energy: 0.079019 Hartree

B3LYP/6-31++G\*\*//B3LYP/6-31+G\* energy: -378.1052605 Hartree

B3LYP/6-311++G\*\*//B3LYP/6-31+G\* energy: -378.2063285 Hartree

B3LYP/aug-cc-pVDZ//B3LYP/6-31+G\* energy: -378.1419317 Hartree

B3LYP/ aug-cc-pVTZ //B3LYP/6-31+G\* energy: -378.2371175 Hartree

MP2/6-31+G\* //B3LYP/6-31+G\* energy: -376.9992308 Hartree

MP2/6-31++G\*\* //B3LYP/6-31+G\* energy: -377.082729 Hartree

MP2/6-311++G\*\* //B3LYP/6-31+G\* energy: -377.2521504 Hartree

MP2/6-311++G(2d,2p)//B3LYP/6-31+G\* energy: -377.3469139 Hartree

MP2/aug-cc-pVDZ //B3LYP/6-31+G\* energy: -377.1869467 Hartree

MP2/aug-cc-pVTZ //B3LYP/6-31+G\* energy: -377.5177153 Hartree

MP2/aug-cc-pVQZ //B3LYP/6-31+G\* energy: -377.6266403 Hartree

MP2/CBS //B3LYP/6-31+G(d) energy: -377.688824 Hartree

CCSD(T)/6-31++G\*\*// B3LYP /6-31+G\* energy: -377.1472 Hartree

CCSD(T)/aug-cc-pVDZ// B3LYP /6-31+G\* energy: -377.2593469 Hartree

Solvent shift(FPCM/0.001 au contour): -0.024781003 Hartree

### PC-b in Figure 2:

Standard orientation:

| Center<br>Number | Atomic<br>Number | Atomic<br>Type | Coordinates (Angstroms) |           |           |
|------------------|------------------|----------------|-------------------------|-----------|-----------|
|                  |                  |                | X                       | Y         | Z         |
| 1                | 6                | 0              | -1.466185               | -0.057305 | -0.080965 |
| 2                | 1                | 0              | -2.918884               | -1.393254 | 0.498693  |
| 3                | 7                | 0              | -2.665345               | -0.686837 | -0.176722 |
| 4                | 1                | 0              | -3.132486               | -0.675342 | -1.070860 |

|    |   |   |           |           |           |
|----|---|---|-----------|-----------|-----------|
| 5  | 8 | 0 | -0.859562 | -0.305209 | 1.093955  |
| 6  | 7 | 0 | 3.521445  | -1.002132 | -0.304001 |
| 7  | 1 | 0 | 4.186156  | -1.084908 | 0.462834  |
| 8  | 1 | 0 | 2.892098  | -0.227366 | -0.091614 |
| 9  | 1 | 0 | 0.006216  | 0.174137  | 1.097235  |
| 10 | 8 | 0 | 1.315659  | 1.220482  | 0.345036  |
| 11 | 1 | 0 | 1.467422  | 2.129526  | 0.644993  |
| 12 | 1 | 0 | 0.657203  | 1.269581  | -0.389410 |
| 13 | 8 | 0 | -1.006291 | 0.676047  | -0.959126 |
| 14 | 1 | 0 | 4.048242  | -0.756326 | -1.139952 |

-----  
B3LYP/6-31+G\* energy: -378.077965 Hartree

Zero-point vibrational energy: 0.112921 Hartree

Thermal correction to Gibbs free energy: 0.073921 Hartree

B3LYP/6-31++G\*\*//B3LYP/6-31+G\* energy: -378.1851004 Hartree

B3LYP/6-311++G\*\*//B3LYP/6-31+G\* energy: -378.2900295 Hartree

B3LYP/aug-cc-pVDZ//B3LYP/6-31+G\* energy: -378.2219705 Hartree

B3LYP/aug-cc-pVTZ //B3LYP/6-31+G\* energy: -378.3235514 Hartree

MP2/6-31+G\* //B3LYP/6-31+G\* energy: -377.0765602 Hartree

MP2/6-31++G\*\* //B3LYP/6-31+G\* energy: -377.1579954 Hartree

MP2/6-311++G\*\* //B3LYP/6-31+G\* energy: -377.3276847 Hartree

MP2/6-311++G(2d,2p)//B3LYP/6-31+G\* energy: -377.4247474 Hartree

MP2/aug-cc-pVDZ //B3LYP/6-31+G\* energy: -377.2591867 Hartree

MP2/aug-cc-pVTZ //B3LYP/6-31+G\* energy: -377.5913766 Hartree

MP2/aug-cc-pVQZ //B3LYP/6-31+G\* energy: -377.7007441 Hartree

MP2/CBS //B3LYP/6-31+G(d) energy: -377.7631784 Hartree

CCSD(T)/6-31++G\*\*// B3LYP /6-31+G\* energy: -377.2237375 Hartree

CCSD(T)/aug-cc-pVDZ// B3LYP /6-31+G\* energy: -377.3328632 Hartree

Solvent shift(FPCM/0.001 au contour): -0.020270045 Hartree

### RC-c1 in Figure 3:

Standard orientation:

-----

| Center<br>Number | Atomic<br>Number | Atomic<br>Type | Coordinates (Angstroms) |           |           |
|------------------|------------------|----------------|-------------------------|-----------|-----------|
|                  |                  |                | X                       | Y         | Z         |
| 1                | 6                | 0              | 0.898218                | 0.012927  | 0.026817  |
| 2                | 1                | 0              | 0.744232                | 2.020014  | 0.054883  |
| 3                | 7                | 0              | 0.281789                | 1.186712  | 0.394522  |
| 4                | 1                | 0              | -0.735596               | 1.210767  | 0.388058  |
| 5                | 8                | 0              | 1.998623                | -0.053475 | -0.504175 |
| 6                | 7                | 0              | 0.130332                | -1.137319 | 0.307887  |
| 7                | 1                | 0              | -0.358287               | -1.116422 | 1.199371  |

-----

|    |   |   |           |           |           |
|----|---|---|-----------|-----------|-----------|
| 8  | 1 | 0 | 0.690604  | -1.977109 | 0.203370  |
| 9  | 1 | 0 | -1.824693 | -0.639936 | -0.476108 |
| 10 | 8 | 0 | -2.457497 | 0.047065  | -0.190226 |
| 11 | 1 | 0 | -3.119414 | 0.130659  | -0.892129 |

-----  
B3LYP/6-31+G\* energy: -301.654297 Hartree

Zero-point vibrational energy: 0.088628 Hartree

Thermal correction to Gibbs free energy: 0.057575 Hartree

B3LYP/6-31++G\*\*//B3LYP/6-31+G\* energy: -301.7362315 Hartree

B3LYP/6-311++G\*\*//B3LYP/6-31+G\* energy: -301.8178901 Hartree

B3LYP/aug-cc-pVDZ//B3LYP/6-31+G\* energy: -301.7649692 Hartree

B3LYP/ aug-cc-pVTZ //B3LYP/6-31+G\* energy: -301.8437875 Hartree

MP2/6-31+G\* //B3LYP/6-31+G\* energy: -300.852119 Hartree

MP2/6-31++G\*\* //B3LYP/6-31+G\* energy: -300.9125851 Hartree

MP2/6-311++G\*\* //B3LYP/6-31+G\* energy: -301.0427357 Hartree

MP2/6-311++G(2d,2p)//B3LYP/6-31+G\* energy: -301.1173616 Hartree

MP2/aug-cc-pVDZ //B3LYP/6-31+G\* energy: -300.987895 Hartree

MP2/aug-cc-pVTZ //B3LYP/6-31+G\* energy: -301.2504068 Hartree

MP2/aug-cc-pVQZ //B3LYP/6-31+G\* energy: -301.337245 Hartree

MP2/CBS //B3LYP/6-31+G(d) energy: -301.3868619 Hartree

CCSD(T)/6-31++G\*\*// B3LYP /6-31+G\* energy: -300.966275 Hartree

CCSD(T)/aug-cc-pVDZ// B3LYP /6-31+G\* energy: -301.0474908 Hartree

Solvent shift(FPCM/0.001 au contour): -0.027576942 Hartree

### TS-c1 in Figure 3:

Standard orientation:

| Center<br>Number | Atomic<br>Number | Atomic<br>Type | Coordinates (Angstroms) |           |           |
|------------------|------------------|----------------|-------------------------|-----------|-----------|
|                  |                  |                | X                       | Y         | Z         |
| 1                | 6                | 0              | 0.405378                | 0.091578  | 0.107211  |
| 2                | 1                | 0              | 1.702781                | -1.355189 | -0.273586 |
| 3                | 7                | 0              | 0.955553                | -0.863765 | -0.757509 |
| 4                | 1                | 0              | 0.248593                | -1.530559 | -1.059149 |
| 5                | 8                | 0              | 0.935116                | 0.556610  | 1.095335  |
| 6                | 7                | 0              | -0.527980               | 1.066465  | -0.701134 |
| 7                | 1                | 0              | -0.351277               | 1.070813  | -1.707250 |
| 8                | 1                | 0              | -0.441678               | 2.003035  | -0.304578 |
| 9                | 1                | 0              | -1.425990               | 0.526495  | -0.372806 |
| 10               | 8                | 0              | -1.382412               | -0.785702 | 0.397134  |
| 11               | 1                | 0              | -1.579340               | -0.850231 | 1.344852  |

-----  
B3LYP/6-31+G\* energy: -301.574547 Hartree

Zero-point vibrational energy: 0.086627 Hartree  
Thermal correction to Gibbs free energy: 0.058104 Hartree  
B3LYP/6-31++G\*\*//B3LYP/6-31+G\* energy: -301.6554513 Hartree  
B3LYP/6-311++G\*\*//B3LYP/6-31+G\* energy: -301.7359617 Hartree  
B3LYP/aug-cc-pVDZ//B3LYP/6-31+G\* energy: -301.6841692 Hartree  
B3LYP/ aug-cc-pVTZ //B3LYP/6-31+G\* energy: -301.7595877 Hartree  
MP2/6-31+G\* //B3LYP/6-31+G\* energy: -300.771378 Hartree  
MP2/6-31++G\*\* //B3LYP/6-31+G\* energy: -300.8299214 Hartree  
MP2/6-311++G\*\* //B3LYP/6-31+G\* energy: -300.9579854 Hartree  
MP2/6-311++G(2d,2p)//B3LYP/6-31+G\* energy: -301.0338826 Hartree  
MP2/aug-cc-pVDZ //B3LYP/6-31+G\* energy: -300.9081129 Hartree  
MP2/aug-cc-pVTZ //B3LYP/6-31+G\* energy: -301.1689693 Hartree  
MP2/aug-cc-pVQZ //B3LYP/6-31+G\* energy: -301.2551139 Hartree  
MP2/CBS //B3LYP/6-31+G(d) energy: -301.3043184 Hartree  
CCSD(T)/6-31++G\*\*// B3LYP /6-31+G\* energy: -300.8813739 Hartree  
CCSD(T)/aug-cc-pVDZ// B3LYP /6-31+G\* energy: -300.9656492 Hartree  
Solvent shift(FPCM/0.001 au contour): -0.035037769 Hartree

**PC-c1 in Figure 3:**

Standard orientation:

| Center<br>Number | Atomic<br>Number | Atomic<br>Type | Coordinates (Angstroms) |           |           |
|------------------|------------------|----------------|-------------------------|-----------|-----------|
|                  |                  |                | X                       | Y         | Z         |
| 1                | 6                | 0              | -0.748958               | 0.092821  | 0.000225  |
| 2                | 1                | 0              | -2.708245               | 0.642460  | -0.117263 |
| 3                | 7                | 0              | -2.095629               | -0.141790 | 0.048535  |
| 4                | 1                | 0              | -2.444818               | -1.072458 | -0.128586 |
| 5                | 8                | 0              | -0.255519               | 1.218019  | -0.007613 |
| 6                | 7                | 0              | 2.500496                | -0.041398 | 0.001900  |
| 7                | 1                | 0              | 3.086146                | -0.137202 | 0.829559  |
| 8                | 1                | 0              | 2.092244                | 0.895625  | 0.004392  |
| 9                | 1                | 0              | 3.099828                | -0.127310 | -0.816975 |
| 10               | 8                | 0              | -0.044816               | -1.050724 | -0.007120 |
| 11               | 1                | 0              | 0.937205                | -0.814085 | -0.007658 |

B3LYP/6-31+G\* energy: -301.668719 Hartree  
Zero-point vibrational energy: 0.089051 Hartree  
Thermal correction to Gibbs free energy: 0.058080 Hartree  
B3LYP/6-31++G\*\*//B3LYP/6-31+G\* energy: -301.748995 Hartree  
B3LYP/6-311++G\*\*//B3LYP/6-31+G\* energy: -301.829324 Hartree  
B3LYP/aug-cc-pVDZ//B3LYP/6-31+G\* energy: -301.7755627 Hartree  
B3LYP/ aug-cc-pVTZ //B3LYP/6-31+G\* energy: -301.8556622 Hartree

MP2/6-31+G\* //B3LYP/6-31+G\* energy: -300.86356 Hartree  
MP2/6-31++G\*\* //B3LYP/6-31+G\* energy: -300.9218392 Hartree  
MP2/6-311++G\*\* //B3LYP/6-31+G\* energy: -301.0504848 Hartree  
MP2/6-311++G(2d,2p)//B3LYP/6-31+G\* energy: -301.125603 Hartree  
MP2/aug-cc-pVDZ //B3LYP/6-31+G\* energy: -300.995489 Hartree  
MP2/aug-cc-pVTZ //B3LYP/6-31+G\* energy: -301.2596046 Hartree  
MP2/aug-cc-pVQZ //B3LYP/6-31+G\* energy: -301.3463023 Hartree  
MP2/CBS //B3LYP/6-31+G(d) energy: -301.3957669 Hartree  
CCSD(T)/6-31++G\*\*// B3LYP /6-31+G\* energy: -300.9757973 Hartree  
CCSD(T)/aug-cc-pVDZ// B3LYP /6-31+G\* energy: -301.0555723 Hartree  
Solvent shift(FPCM/0.001 au contour): -0.020368766 Hartree

### RC-c2 in Figure 3:

Standard orientation:

| Center<br>Number | Atomic<br>Number | Atomic<br>Type | Coordinates (Angstroms) |           |           |
|------------------|------------------|----------------|-------------------------|-----------|-----------|
|                  |                  |                | X                       | Y         | Z         |
| 1                | 6                | 0              | -1.362125               | 0.028607  | 0.035281  |
| 2                | 1                | 0              | -1.433355               | 1.634743  | -1.193316 |
| 3                | 7                | 0              | -0.901609               | 1.222927  | -0.439813 |
| 4                | 1                | 0              | 0.081133                | 1.473881  | -0.341108 |
| 5                | 8                | 0              | -2.444384               | -0.466504 | -0.253136 |
| 6                | 7                | 0              | -0.453743               | -0.633020 | 0.898763  |
| 7                | 1                | 0              | -0.945610               | -1.301791 | 1.483280  |
| 8                | 1                | 0              | 0.148378                | -0.014698 | 1.439718  |
| 9                | 1                | 0              | 1.030939                | -1.397617 | -0.169138 |
| 10               | 8                | 0              | 1.911326                | -1.351906 | -0.610919 |
| 11               | 1                | 0              | 2.376262                | -2.175389 | -0.403155 |
| 12               | 1                | 0              | 2.245381                | 0.366226  | -0.072117 |
| 13               | 8                | 0              | 1.963993                | 1.227771  | 0.314509  |
| 14               | 1                | 0              | 2.709604                | 1.838758  | 0.227869  |

B3LYP/6-31+G\* energy: -378.074553 Hartree  
Zero-point vibrational energy: 0.114039 Hartree  
Thermal correction to Gibbs free energy: 0.079295 Hartree  
B3LYP/6-31++G\*\*//B3LYP/6-31+G\* energy: -378.1888441 Hartree  
B3LYP/6-311++G\*\*//B3LYP/6-31+G\* energy: -378.2940962 Hartree  
B3LYP/aug-cc-pVDZ//B3LYP/6-31+G\* energy: -378.2253382 Hartree  
B3LYP/ aug-cc-pVTZ //B3LYP/6-31+G\* energy: -378.3250894 Hartree  
MP2/6-31+G\* //B3LYP/6-31+G\* energy: -377.082916 Hartree  
MP2/6-31++G\*\* //B3LYP/6-31+G\* energy: -377.1656207 Hartree  
MP2/6-311++G\*\* //B3LYP/6-31+G\* energy: -377.3361021 Hartree  
MP2/6-311++G(2d,2p)//B3LYP/6-31+G\* energy: -377.4310027 Hartree

MP2/aug-cc-pVDZ //B3LYP/6-31+G\* energy: -377.2667973 Hartree  
MP2/aug-cc-pVTZ //B3LYP/6-31+G\* energy: -377.5970224 Hartree  
MP2/aug-cc-pVQZ //B3LYP/6-31+G\* energy: -377.7063768 Hartree  
MP2/CBS //B3LYP/6-31+G(d) energy: -377.76887 Hartree  
CCSD(T)/6-31++G\*\*// B3LYP /6-31+G\* energy: -377.2299549 Hartree  
CCSD(T)/aug-cc-pVDZ// B3LYP /6-31+G\* energy: -377.3390106 Hartree  
Solvent shift(FPCM/0.001 au contour): -0.031683881 Hartree

**TS-c2 in Figure 3:**

Standard orientation:

| Center<br>Number | Atomic<br>Number | Atomic<br>Type | Coordinates (Angstroms) |           |           |
|------------------|------------------|----------------|-------------------------|-----------|-----------|
|                  |                  |                | X                       | Y         | Z         |
| 1                | 6                | 0              | 0.935689                | 0.154869  | -0.003727 |
| 2                | 1                | 0              | 0.976729                | 1.657898  | -1.309346 |
| 3                | 7                | 0              | 0.476993                | 1.364170  | -0.477220 |
| 4                | 1                | 0              | -0.535927               | 1.450546  | -0.556420 |
| 5                | 8                | 0              | 2.043693                | -0.311245 | -0.139163 |
| 6                | 7                | 0              | 0.169916                | -0.214708 | 1.298137  |
| 7                | 1                | 0              | 0.639411                | 0.188202  | 2.113657  |
| 8                | 1                | 0              | 0.187934                | -1.238740 | 1.313853  |
| 9                | 1                | 0              | -0.831963               | 0.080139  | 1.226883  |
| 10               | 8                | 0              | -2.197202               | 0.370517  | 0.073206  |
| 11               | 1                | 0              | -3.143036               | 0.173728  | 0.124058  |
| 12               | 1                | 0              | -1.697137               | -0.396053 | -0.463495 |
| 13               | 8                | 0              | -0.527800               | -1.235589 | -0.748888 |
| 14               | 1                | 0              | -0.288029               | -1.480634 | -1.654490 |

B3LYP/6-31+G\* energy: -378.0019387 Hartree  
Zero-point vibrational energy: 0.113815 Hartree  
Thermal correction to Gibbs free energy: 0.082689 Hartree  
B3LYP/6-31++G\*\*//B3LYP/6-31+G\* energy: -378.1173079 Hartree  
B3LYP/6-311++G\*\*//B3LYP/6-31+G\* energy: -378.2216737 Hartree  
B3LYP/aug-cc-pVDZ//B3LYP/6-31+G\* energy: -378.1530715 Hartree  
B3LYP/ aug-cc-pVTZ //B3LYP/6-31+G\* energy: -378.2499303 Hartree  
MP2/6-31+G\* //B3LYP/6-31+G\* energy: -377.014833 Hartree  
MP2/6-31++G\*\* //B3LYP/6-31+G\* energy: -377.0947651 Hartree  
MP2/6-311++G\*\* //B3LYP/6-31+G\* energy: -377.2626508 Hartree  
MP2/6-311++G(2d,2p)//B3LYP/6-31+G\* energy: -377.3592754 Hartree  
MP2/aug-cc-pVDZ //B3LYP/6-31+G\* energy: -377.1980749 Hartree  
MP2/aug-cc-pVTZ //B3LYP/6-31+G\* energy: -377.5267928 Hartree  
MP2/aug-cc-pVQZ //B3LYP/6-31+G\* energy: -377.63534 Hartree  
MP2/CBS //B3LYP/6-31+G(d) energy: -377.6973395 Hartree



CCSD(T)/6-31++G\*\*// B3LYP /6-31+G\* energy: -377.1566416 Hartree  
CCSD(T)/aug-cc-pVDZ// B3LYP /6-31+G\* energy: -377.2680172 Hartree  
Solvent shift(FPCM/0.001 au contour): -0.038507256 Hartree

**PC-c2 in Figure 3:**

Standard orientation:

| Center<br>Number | Atomic<br>Number | Atomic<br>Type | Coordinates (Angstroms) |           |           |
|------------------|------------------|----------------|-------------------------|-----------|-----------|
|                  |                  |                | X                       | Y         | Z         |
| 1                | 6                | 0              | -0.050970               | 0.798842  | 0.014776  |
| 2                | 1                | 0              | 1.284842                | 2.324515  | -0.082976 |
| 3                | 7                | 0              | 1.198199                | 1.327901  | 0.043837  |
| 4                | 1                | 0              | 2.017623                | 0.729551  | -0.025424 |
| 5                | 8                | 0              | -1.088926               | 1.454164  | -0.030312 |
| 6                | 7                | 0              | -2.699289               | -1.091018 | -0.011040 |
| 7                | 1                | 0              | -2.862865               | -0.082214 | -0.041000 |
| 8                | 1                | 0              | -3.181715               | -1.469285 | 0.802247  |
| 9                | 1                | 0              | -3.115126               | -1.506725 | -0.842726 |
| 10               | 8                | 0              | 2.716007                | -1.208095 | -0.122433 |
| 11               | 1                | 0              | 3.133134                | -1.678095 | 0.614257  |
| 12               | 1                | 0              | 1.755778                | -1.374251 | -0.044099 |
| 13               | 8                | 0              | -0.030767               | -0.559190 | 0.060375  |
| 14               | 1                | 0              | -0.988740               | -0.889761 | 0.040440  |

B3LYP/6-31+G\* energy: -378.083800 Hartree  
Zero-point vibrational energy: 0.113741 Hartree  
Thermal correction to Gibbs free energy: 0.078187 Hartree  
B3LYP/6-31++G\*\*//B3LYP/6-31+G\* energy: -378.1949582 Hartree  
B3LYP/6-311++G\*\*//B3LYP/6-31+G\* energy: -378.2993241 Hartree  
B3LYP/aug-cc-pVDZ//B3LYP/6-31+G\* energy: -378.2303657 Hartree  
B3LYP/ aug-cc-pVTZ //B3LYP/6-31+G\* energy: -378.3313517 Hartree  
MP2/6-31+G\* //B3LYP/6-31+G\* energy: -377.087948 Hartree  
MP2/6-31++G\*\* //B3LYP/6-31+G\* energy: -377.1687031 Hartree  
MP2/6-311++G\*\* //B3LYP/6-31+G\* energy: -377.3378245 Hartree  
MP2/6-311++G(2d,2p)//B3LYP/6-31+G\* energy: -377.4340595 Hartree  
MP2/aug-cc-pVDZ //B3LYP/6-31+G\* energy: -377.2692091 Hartree  
MP2/aug-cc-pVTZ //B3LYP/6-31+G\* energy: -377.6010137 Hartree  
MP2/aug-cc-pVQZ //B3LYP/6-31+G\* energy: -377.7102787 Hartree  
MP2/CBS //B3LYP/6-31+G(d) energy: -377.7726563 Hartree  
CCSD(T)/6-31++G\*\*// B3LYP /6-31+G\* energy: -377.2337376 Hartree  
CCSD(T)/aug-cc-pVDZ// B3LYP /6-31+G\* energy: -377.3422703 Hartree  
Solvent shift(FPCM/0.001 au contour): -0.024507031 Hartree

**Me<sub>4</sub>U(H<sub>2</sub>O) of SR-d in Figure 5:**

Standard orientation:

| Center<br>Number | Atomic<br>Number | Atomic<br>Type | Coordinates (Angstroms) |           |           |
|------------------|------------------|----------------|-------------------------|-----------|-----------|
|                  |                  |                | X                       | Y         | Z         |
| 1                | 6                | 0              | 0.090595                | -0.113889 | -0.243522 |
| 2                | 8                | 0              | -0.893542               | -0.764487 | -0.627441 |
| 3                | 7                | 0              | 1.326953                | -0.718340 | -0.068321 |
| 4                | 8                | 0              | -3.455640               | -1.041611 | 0.551349  |
| 5                | 1                | 0              | -2.594926               | -1.025181 | 0.084482  |
| 6                | 1                | 0              | -4.014820               | -1.648680 | 0.045857  |
| 7                | 7                | 0              | 0.015473                | 1.241651  | 0.017004  |
| 8                | 6                | 0              | 2.197133                | -0.384216 | 1.058432  |
| 9                | 1                | 0              | 3.236863                | -0.261726 | 0.728536  |
| 10               | 1                | 0              | 1.867506                | 0.535061  | 1.541956  |
| 11               | 1                | 0              | 2.166713                | -1.189817 | 1.807100  |
| 12               | 6                | 0              | 1.446210                | -2.099467 | -0.525798 |
| 13               | 1                | 0              | 1.049992                | -2.810895 | 0.214003  |
| 14               | 1                | 0              | 0.894150                | -2.229840 | -1.456794 |
| 15               | 1                | 0              | 2.505522                | -2.319867 | -0.697234 |
| 16               | 6                | 0              | -1.314266               | 1.848743  | 0.016681  |
| 17               | 1                | 0              | -2.039851               | 1.182224  | 0.482640  |
| 18               | 1                | 0              | -1.267686               | 2.780834  | 0.589807  |
| 19               | 1                | 0              | -1.655800               | 2.076833  | -1.003783 |
| 20               | 6                | 0              | 1.099471                | 2.161127  | -0.323180 |
| 21               | 1                | 0              | 1.347916                | 2.812764  | 0.524790  |
| 22               | 1                | 0              | 1.991748                | 1.611459  | -0.623218 |
| 23               | 1                | 0              | 0.794286                | 2.798644  | -1.165874 |

B3LYP/6-31+G\* energy: -458.777147 Hartree

Zero-point vibrational energy: 0.200505 Hartree

Thermal correction to Gibbs free energy: 0.161277 Hartree

B3LYP/6-31++G\*\*//B3LYP/6-31+G\* energy: -458.965217 Hartree

B3LYP/6-311++G\*\*//B3LYP/6-31+G\* energy: -459.072682 Hartree

B3LYP/aug-cc-pVDZ//B3LYP/6-31+G\* energy: -458.9896271 Hartree

B3LYP/ aug-cc-pVTZ //B3LYP/6-31+G\* energy: -459.1135268 Hartree

MP2/6-31+G\* //B3LYP/6-31+G\* energy: -457.486515 Hartree

MP2/6-31++G\*\* //B3LYP/6-31+G\* energy: -457.6057153 Hartree

MP2/6-311++G\*\* //B3LYP/6-31+G\* energy: -457.780636 Hartree

MP2/6-311++G(2d,2p)//B3LYP/6-31+G\* energy: -457.8960512 Hartree

MP2/aug-cc-pVDZ //B3LYP/6-31+G\* energy: -457.6938239 Hartree

MP2/aug-cc-pVTZ //B3LYP/6-31+G\* energy: -458.1071502 Hartree

MP2/aug-cc-pVQZ //B3LYP/6-31+G\* energy: -458.2381285 Hartree

MP2/CBS //B3LYP/6-31+G(d) energy: -458.3123583 Hartree  
CCSD(T)/6-31++G\*\*// B3LYP /6-31+G\* energy: -457.7293943 Hartree  
CCSD(T)/aug-cc-pVDZ// B3LYP /6-31+G\* energy: -457.8284386 Hartree  
Solvent shift (FPCM/0.001 au contour): -0.018773258 Hartree

**OH(H<sub>2</sub>O)<sub>3</sub> of SR-d in Figure 5:**

Standard orientation:

| Center<br>Number | Atomic<br>Number | Atomic<br>Type | Coordinates (Angstroms) |           |           |
|------------------|------------------|----------------|-------------------------|-----------|-----------|
|                  |                  |                | X                       | Y         | Z         |
| 1                | 8                | 0              | -0.001590               | -0.001083 | 0.735230  |
| 2                | 1                | 0              | -0.002094               | -0.003006 | 1.703932  |
| 3                | 8                | 0              | 1.616780                | -1.855569 | -0.244956 |
| 4                | 1                | 0              | 1.046296                | -1.123472 | 0.177749  |
| 5                | 1                | 0              | 0.965452                | -2.367795 | -0.746417 |
| 6                | 8                | 0              | -2.419773               | -0.467475 | -0.245370 |
| 7                | 1                | 0              | -2.529925               | 0.352598  | -0.748788 |
| 8                | 1                | 0              | -1.499592               | -0.346678 | 0.176335  |
| 9                | 8                | 0              | 0.804171                | 2.325149  | -0.244374 |
| 10               | 1                | 0              | 1.571457                | 2.012932  | -0.746324 |
| 11               | 1                | 0              | 0.451709                | 1.467239  | 0.179276  |

B3IYP/6-31+G\* energy: -305.136485 Hartree  
Zero-point vibrational energy: 0.082737 Hartree  
Thermal correction to Gibbs free energy: 0.046521 Hartree  
B3IYP/6-31++G\*\*//B3LYP/6-31+G\* energy: -305.2232863 Hartree  
B3IYP/6-311++G\*\*//B3LYP/6-31+G\* energy: -305.3178539 Hartree  
B3IYP/aug-cc-pVDZ//B3LYP/6-31+G\* energy: -305.2585016 Hartree  
B3IYP/ aug-cc-pVTZ //B3LYP/6-31+G\* energy: -305.3408226 Hartree  
MP2/6-31+G\* //B3LYP/6-31+G\* energy: -304.335055 Hartree  
MP2/6-31++G\*\* //B3LYP/6-31+G\* energy: -304.4179181 Hartree  
MP2/6-311++G\*\* //B3LYP/6-31+G\* energy: -304.5780106 Hartree  
MP2/6-311++G(2d,2p)//B3LYP/6-31+G\* energy: -304.6640567 Hartree  
MP2/aug-cc-pVDZ //B3LYP/6-31+G\* energy: -304.5277586 Hartree  
MP2/aug-cc-pVTZ //B3LYP/6-31+G\* energy: -304.7972153 Hartree  
MP2/aug-cc-pVQZ //B3LYP/6-31+G\* energy: -304.8876915 Hartree  
MP2/CBS //B3LYP/6-31+G(d) energy: -304.9395266 Hartree  
CCSD(T)/6-31++G\*\*// B3LYP /6-31+G\* energy: -304.4565969 Hartree  
CCSD(T)/aug-cc-pVDZ// B3LYP /6-31+G\* energy: -304.5745667 Hartree  
Solvent shift (FPCM/0.001 au contour): -0.102735477 Hartree

**TS1-d in Figure 5:**

Standard orientation:

| Center<br>Number | Atomic<br>Number | Atomic<br>Type | Coordinates (Angstroms) |           |           |
|------------------|------------------|----------------|-------------------------|-----------|-----------|
|                  |                  |                | X                       | Y         | Z         |
| 1                | 6                | 0              | -0.142586               | -0.620993 | 0.396868  |
| 2                | 8                | 0              | 1.118437                | -0.737031 | 0.526276  |
| 3                | 7                | 0              | -0.844530               | -0.092273 | 1.509912  |
| 4                | 8                | 0              | -0.388845               | 0.835994  | -0.864886 |
| 5                | 1                | 0              | 0.118957                | 0.469828  | -1.607475 |
| 6                | 8                | 0              | 3.115901                | 0.994737  | 0.256525  |
| 7                | 1                | 0              | 3.559305                | 1.002463  | 1.117026  |
| 8                | 1                | 0              | 2.299662                | 0.429327  | 0.395122  |
| 9                | 8                | 0              | 3.169378                | -1.663039 | -1.221335 |
| 10               | 1                | 0              | 3.582701                | -0.800235 | -1.042482 |
| 11               | 1                | 0              | 2.325468                | -1.572505 | -0.725925 |
| 12               | 8                | 0              | -2.414966               | 2.244218  | -1.786090 |
| 13               | 1                | 0              | -1.649405               | 1.672523  | -1.451376 |
| 14               | 1                | 0              | -2.040210               | 3.137348  | -1.802322 |
| 15               | 8                | 0              | 1.157434                | 3.096267  | -0.430513 |
| 16               | 1                | 0              | 0.543167                | 2.329002  | -0.581185 |
| 17               | 1                | 0              | 1.995656                | 2.641549  | -0.223411 |
| 18               | 7                | 0              | -0.768545               | -1.672193 | -0.364841 |
| 19               | 6                | 0              | -0.410414               | -3.025537 | 0.013964  |
| 20               | 1                | 0              | -0.356284               | -3.665290 | -0.879989 |
| 21               | 1                | 0              | 0.566945                | -3.027948 | 0.498306  |
| 22               | 1                | 0              | -1.151215               | -3.479073 | 0.704343  |
| 23               | 6                | 0              | -2.016288               | -1.575691 | -1.091174 |
| 24               | 1                | 0              | -2.244077               | -0.535462 | -1.315231 |
| 25               | 1                | 0              | -1.918721               | -2.119226 | -2.045415 |
| 26               | 1                | 0              | -2.871250               | -2.030272 | -0.551779 |
| 27               | 6                | 0              | -0.122157               | 0.924780  | 2.271280  |
| 28               | 1                | 0              | -0.647270               | 1.083490  | 3.221618  |
| 29               | 1                | 0              | 0.886292                | 0.567901  | 2.484561  |
| 30               | 1                | 0              | -0.052698               | 1.882646  | 1.734740  |
| 31               | 6                | 0              | -2.269845               | 0.196631  | 1.409006  |
| 32               | 1                | 0              | -2.488381               | 1.041620  | 0.739394  |
| 33               | 1                | 0              | -2.818142               | -0.679887 | 1.063666  |
| 34               | 1                | 0              | -2.639948               | 0.439164  | 2.412850  |

B3LYP/6-31+G\* energy: -763.870157 Hartree

Zero-point vibrational energy: 0.287434 Hartree

Thermal correction to Gibbs free energy: 0.234299 Hartree

B3LYP/6-31++G\*\*//B3LYP/6-31+G\* energy: -764.1693078 Hartree

B3LYP/6-311++G\*\*//B3LYP/6-31+G\* energy: -764.370761 Hartree

B3LYP/aug-cc-pVDZ//B3LYP/6-31+G\* energy: -764.2290198 Hartree  
B3LYP/ aug-cc-pVTZ //B3LYP/6-31+G\* energy: -764.430983 Hartree  
MP2/6-31+G\* //B3LYP/6-31+G\* energy: -761.8203705 Hartree  
MP2/6-31++G\*\* //B3LYP/6-31+G\* energy: -762.0205068 Hartree  
MP2/6-311++G\*\* //B3LYP/6-31+G\* energy: -762.353967 Hartree  
MP2/6-311++G(2d,2p)//B3LYP/6-31+G\* energy: -762.5535801 Hartree  
MP2/aug-cc-pVDZ //B3LYP/6-31+G\* energy: -762.2198783 Hartree  
MP2/aug-cc-pVTZ //B3LYP/6-31+G\* energy: -762.8985195 Hartree  
MP2/aug-cc-pVQZ //B3LYP/6-31+G\* energy: -763.1178537 Hartree  
MP2/CBS //B3LYP/6-31+G(d) energy: -763.242628 Hartree  
CCSD(T)/6-31++G\*\*// B3LYP /6-31+G\* energy: -762.185871 Hartree  
CCSD(T)/aug-cc-pVDZ// B3LYP /6-31+G\* energy: -762.403999 Hartree  
Solvent shift(FPCM/0.001 au contour): -0.0929143 Hartree

### INT-d in Figure 5:

Standard orientation:

| Center<br>Number | Atomic<br>Number | Atomic<br>Type | Coordinates (Angstroms) |           |           |
|------------------|------------------|----------------|-------------------------|-----------|-----------|
|                  |                  |                | X                       | Y         | Z         |
| 1                | 6                | 0              | -0.259589               | -0.300312 | -0.227654 |
| 2                | 8                | 0              | 0.992016                | -0.664100 | -0.145735 |
| 3                | 7                | 0              | -0.881182               | 0.153984  | 1.099810  |
| 4                | 8                | 0              | -0.363109               | 0.903978  | -1.095467 |
| 5                | 1                | 0              | -1.260222               | 1.272637  | -1.002759 |
| 6                | 8                | 0              | 2.870359                | -2.053339 | 1.321636  |
| 7                | 1                | 0              | 2.043807                | -1.749096 | 0.873648  |
| 8                | 1                | 0              | 3.468345                | -1.309630 | 1.138616  |
| 9                | 8                | 0              | 3.249346                | 0.665222  | -0.387588 |
| 10               | 1                | 0              | 2.338290                | 0.232296  | -0.306178 |
| 11               | 1                | 0              | 3.595349                | 0.320933  | -1.224233 |
| 12               | 8                | 0              | -2.947224               | 1.976074  | 0.606162  |
| 13               | 1                | 0              | -2.518682               | 2.812784  | 0.840479  |
| 14               | 1                | 0              | -2.276833               | 1.269658  | 0.856088  |
| 15               | 8                | 0              | 1.691992                | 2.955956  | -1.228825 |
| 16               | 1                | 0              | 2.410691                | 2.379594  | -0.895419 |
| 17               | 1                | 0              | 0.943914                | 2.324678  | -1.279259 |
| 18               | 7                | 0              | -1.126414               | -1.377717 | -0.767464 |
| 19               | 6                | 0              | -1.129914               | -0.968681 | 2.014818  |
| 20               | 1                | 0              | -1.841073               | -1.668491 | 1.573830  |
| 21               | 1                | 0              | -0.203889               | -1.516675 | 2.251536  |
| 22               | 1                | 0              | -1.549429               | -0.571287 | 2.948444  |
| 23               | 6                | 0              | -0.499593               | -2.128535 | -1.845621 |
| 24               | 1                | 0              | -0.450124               | -1.556310 | -2.793384 |

|    |   |   |           |           |           |
|----|---|---|-----------|-----------|-----------|
| 25 | 1 | 0 | 0.513970  | -2.403685 | -1.554153 |
| 26 | 1 | 0 | -1.085699 | -3.040254 | -2.028703 |
| 27 | 6 | 0 | -2.491804 | -1.014807 | -1.114018 |
| 28 | 1 | 0 | -2.970776 | -0.458833 | -0.305361 |
| 29 | 1 | 0 | -2.561491 | -0.405143 | -2.036999 |
| 30 | 1 | 0 | -3.073333 | -1.932349 | -1.282303 |
| 31 | 6 | 0 | 0.021513  | 1.112860  | 1.761260  |
| 32 | 1 | 0 | 0.963315  | 0.640649  | 2.075325  |
| 33 | 1 | 0 | 0.261216  | 1.933875  | 1.082152  |
| 34 | 1 | 0 | -0.484895 | 1.517309  | 2.648030  |

-----  
B3IYP/6-31+G\* energy: -763.881257 Hartree

Zero-point vibrational energy: 0.289453 Hartree

Thermal correction to Gibbs free energy: 0.237493 Hartree

B3IYP/6-31++G\*\*//B3LYP/6-31+G\* energy: -764.183611 Hartree

B3IYP/6-311++G\*\*//B3LYP/6-31+G\* energy: -764.383749 Hartree

B3IYP/aug-cc-pVDZ//B3LYP/6-31+G\* energy: -764.2436195 Hartree

B3IYP/ aug-cc-pVTZ //B3LYP/6-31+G\* energy: -764.4447349 Hartree

MP2/6-31+G\* //B3LYP/6-31+G\* energy: -761.8441533 Hartree

MP2/6-31++G\*\* //B3LYP/6-31+G\* energy: -762.0439901 Hartree

MP2/6-311++G\*\* //B3LYP/6-31+G\* energy: -762.378719 Hartree

MP2/6-311++G(2d,2p)//B3LYP/6-31+G\* energy: -762.5763917 Hartree

MP2/aug-cc-pVDZ //B3LYP/6-31+G\* energy: -762.2437534 Hartree

MP2/aug-cc-pVTZ //B3LYP/6-31+G\* energy: -762.9222924 Hartree

MP2/aug-cc-pVQZ //B3LYP/6-31+G\* energy: -763.1412111 Hartree

MP2/CBS //B3LYP/6-31+G(d) energy: -763.2657068 Hartree

CCSD(T)/6-31++G\*\*// B3LYP /6-31+G\* energy: -762.2097447 Hartree

CCSD(T)/aug-cc-pVDZ// B3LYP /6-31+G\* energy: -762.4281285 Hartree

Solvent shift(FPCM/0.001 au contour): -0.090332011 Hartree

### TS2-d in Figure 5:

Standard orientation:

-----

| Center<br>Number | Atomic<br>Number | Atomic<br>Type | Coordinates (Angstroms) |           |           |
|------------------|------------------|----------------|-------------------------|-----------|-----------|
|                  |                  |                | X                       | Y         | Z         |
| 1                | 6                | 0              | -0.322945               | -0.202620 | -0.283919 |
| 2                | 8                | 0              | 0.869751                | -0.705459 | -0.249040 |
| 3                | 7                | 0              | -0.812780               | 0.214550  | 1.245353  |
| 4                | 8                | 0              | -0.389674               | 1.055264  | -0.960038 |
| 5                | 1                | 0              | -1.192835               | 1.565050  | -0.629942 |
| 6                | 8                | 0              | 2.746040                | -2.221568 | 1.129958  |
| 7                | 1                | 0              | 1.914024                | -1.880647 | 0.727485  |
| 8                | 1                | 0              | 3.389509                | -1.563138 | 0.815941  |

-----

|    |   |   |           |           |           |
|----|---|---|-----------|-----------|-----------|
| 9  | 8 | 0 | 3.265807  | 0.317397  | -0.651506 |
| 10 | 1 | 0 | 2.312650  | 0.009455  | -0.530222 |
| 11 | 1 | 0 | 3.491550  | 0.044996  | -1.553114 |
| 12 | 8 | 0 | -2.432748 | 2.008280  | 0.515351  |
| 13 | 1 | 0 | -2.272459 | 2.880620  | 0.905773  |
| 14 | 1 | 0 | -1.626221 | 1.021265  | 1.079716  |
| 15 | 8 | 0 | 1.905377  | 2.860208  | -1.026313 |
| 16 | 1 | 0 | 2.576344  | 2.168338  | -0.858138 |
| 17 | 1 | 0 | 1.078898  | 2.335152  | -1.080021 |
| 18 | 7 | 0 | -1.345325 | -1.152969 | -0.761690 |
| 19 | 6 | 0 | -1.298983 | -0.926325 | 2.036539  |
| 20 | 1 | 0 | -2.209406 | -1.324050 | 1.589037  |
| 21 | 1 | 0 | -0.539655 | -1.715848 | 2.062969  |
| 22 | 1 | 0 | -1.508248 | -0.589258 | 3.059623  |
| 23 | 6 | 0 | -0.839783 | -2.112925 | -1.733481 |
| 24 | 1 | 0 | -0.648201 | -1.657534 | -2.725558 |
| 25 | 1 | 0 | 0.088697  | -2.555183 | -1.372724 |
| 26 | 1 | 0 | -1.590829 | -2.904134 | -1.865950 |
| 27 | 6 | 0 | -2.622809 | -0.592800 | -1.193999 |
| 28 | 1 | 0 | -2.990667 | 0.161670  | -0.495292 |
| 29 | 1 | 0 | -2.559572 | -0.117117 | -2.190391 |
| 30 | 1 | 0 | -3.359670 | -1.406890 | -1.252755 |
| 31 | 6 | 0 | 0.303543  | 0.896540  | 1.933298  |
| 32 | 1 | 0 | 1.122082  | 0.195823  | 2.117202  |
| 33 | 1 | 0 | 0.664076  | 1.714916  | 1.308408  |
| 34 | 1 | 0 | -0.063884 | 1.301247  | 2.884389  |

-----  
B3LYP/6-31+G\* energy: -763.869555 Hartree

Zero-point vibrational energy: 0.287690 Hartree

Thermal correction to Gibbs free energy: 0.238130 Hartree

B3LYP/6-31++G\*\*//B3LYP/6-31+G\* energy: -764.172319 Hartree

B3LYP/6-311++G\*\*//B3LYP/6-31+G\* energy: -764.371606 Hartree

B3LYP/aug-cc-pVDZ//B3LYP/6-31+G\* energy: -764.2315009 Hartree

B3LYP/ aug-cc-pVTZ //B3LYP/6-31+G\* energy: -764.4303473 Hartree

MP2/6-31+G\* //B3LYP/6-31+G\* energy: -761.8317082 Hartree

MP2/6-31++G\*\* //B3LYP/6-31+G\* energy: -762.0313066 Hartree

MP2/6-311++G\*\* //B3LYP/6-31+G\* energy: -762.363784 Hartree

MP2/6-311++G(2d,2p)//B3LYP/6-31+G\* energy: -762.5630893 Hartree

MP2/aug-cc-pVDZ //B3LYP/6-31+G\* energy: -762.231568 Hartree

MP2/aug-cc-pVTZ //B3LYP/6-31+G\* energy: -762.9101033 Hartree

MP2/aug-cc-pVQZ //B3LYP/6-31+G\* energy: -763.128679 Hartree

MP2/CBS //B3LYP/6-31+G(d) energy: -763.2529437 Hartree

CCSD(T)/6-31++G\*\*// B3LYP /6-31+G\* energy: -762.1946108 Hartree

CCSD(T)/aug-cc-pVDZ// B3LYP /6-31+G\* energy: -762.4136298 Hartree

Solvent shift(FPCM/0.001 au contour): -0.091913764 Hartree

**PC-d in Figure 5:**

Standard orientation:

| Center<br>Number | Atomic<br>Number | Atomic<br>Type | Coordinates (Angstroms) |           |           |
|------------------|------------------|----------------|-------------------------|-----------|-----------|
|                  |                  |                | X                       | Y         | Z         |
| 1                | 6                | 0              | 1.780822                | -0.579193 | -0.471691 |
| 2                | 8                | 0              | 2.339680                | 0.436852  | 0.060624  |
| 3                | 7                | 0              | -4.258630               | -0.602294 | 0.751576  |
| 4                | 8                | 0              | 0.869637                | -0.550201 | -1.351613 |
| 5                | 1                | 0              | -1.111061               | -0.615373 | -1.120336 |
| 6                | 8                | 0              | 2.932705                | 2.148470  | 2.284345  |
| 7                | 1                | 0              | 2.839815                | 1.344589  | 1.732928  |
| 8                | 1                | 0              | 2.459955                | 2.804477  | 1.741520  |
| 9                | 8                | 0              | 1.625748                | 2.976386  | -0.345495 |
| 10               | 1                | 0              | 1.849876                | 1.998335  | -0.269678 |
| 11               | 1                | 0              | 2.318002                | 3.340198  | -0.917061 |
| 12               | 8                | 0              | -1.993934               | -0.201528 | -1.212845 |
| 13               | 1                | 0              | -1.745443               | 0.686055  | -1.548226 |
| 14               | 1                | 0              | -3.464780               | -0.528019 | 0.107639  |
| 15               | 8                | 0              | -0.270552               | 1.849163  | -2.236178 |
| 16               | 1                | 0              | 0.128116                | 2.477009  | -1.600940 |
| 17               | 1                | 0              | 0.250723                | 1.026530  | -2.064534 |
| 18               | 7                | 0              | 2.249072                | -1.841449 | -0.067354 |
| 19               | 6                | 0              | -5.478822               | -0.236076 | 0.051583  |
| 20               | 1                | 0              | -5.572534               | -0.838024 | -0.859230 |
| 21               | 1                | 0              | -6.353432               | -0.441963 | 0.686510  |
| 22               | 1                | 0              | -5.524785               | 0.834328  | -0.240220 |
| 23               | 6                | 0              | 3.131081                | -1.968175 | 1.075039  |
| 24               | 1                | 0              | 3.798873                | -2.829735 | 0.931122  |
| 25               | 1                | 0              | 3.730961                | -1.063676 | 1.172745  |
| 26               | 1                | 0              | 2.576300                | -2.123909 | 2.017950  |
| 27               | 6                | 0              | 1.523677                | -3.037985 | -0.444048 |
| 28               | 1                | 0              | 0.962134                | -2.840517 | -1.356968 |
| 29               | 1                | 0              | 2.229420                | -3.863035 | -0.620056 |
| 30               | 1                | 0              | 0.816078                | -3.359799 | 0.341363  |
| 31               | 6                | 0              | -4.010220               | 0.233727  | 1.916107  |
| 32               | 1                | 0              | -4.783264               | 0.055615  | 2.678235  |
| 33               | 1                | 0              | -3.039122               | -0.024484 | 2.351719  |



34            1            0            -4.004434       1.320665       1.693310

-----  
B3LYP/6-31+G\* energy: -763.953545 Hartree  
Zero-point vibrational energy: 0.289353 Hartree  
Thermal correction to Gibbs free energy: 0.229808 Hartree  
B3LYP/6-31++G\*\*//B3LYP/6-31+G\* energy: -764.244806 Hartree  
B3LYP/6-311++G\*\*//B3LYP/6-31+G\* energy: -764.447696 Hartree  
B3LYP/aug-cc-pVDZ//B3LYP/6-31+G\* energy: -764.3010912 Hartree  
B3LYP/ aug-cc-pVTZ //B3LYP/6-31+G\* energy: -764.50986 Hartree  
MP2/6-31+G\* //B3LYP/6-31+G\* energy: -761.8823246 Hartree  
MP2/6-31++G\*\* //B3LYP/6-31+G\* energy: -762.0789142 Hartree  
MP2/6-311++G\*\* //B3LYP/6-31+G\* energy: -762.412637 Hartree  
MP2/6-311++G(2d,2p)//B3LYP/6-31+G\* energy: -762.6118317 Hartree  
MP2/aug-cc-pVDZ //B3LYP/6-31+G\* energy: -762.2716537 Hartree  
MP2/aug-cc-pVTZ //B3LYP/6-31+G\* energy: -762.9560947 Hartree  
MP2/aug-cc-pVQZ //B3LYP/6-31+G\* energy: -763.1777898 Hartree  
MP2/CBS //B3LYP/6-31+G(d) energy: -763.3039604 Hartree  
CCSD(T)/6-31++G\*\*// B3LYP /6-31+G\* energy: -762.2454714 Hartree  
CCSD(T)/aug-cc-pVDZ// B3LYP /6-31+G\* energy: -762.4577975Hartree  
Solvent shift(FPCM/0.001 au contour): -0.082351784 Hartree

**RC-e in Figure 6:**

Standard orientation:

-----

| Center<br>Number | Atomic<br>Number | Atomic<br>Type | Coordinates (Angstroms) |           |           |
|------------------|------------------|----------------|-------------------------|-----------|-----------|
|                  |                  |                | X                       | Y         | Z         |
| 1                | 6                | 0              | -1.267488               | 0.310694  | -0.122376 |
| 2                | 7                | 0              | -1.241052               | -1.049933 | 0.073220  |
| 3                | 8                | 0              | -2.230929               | 0.879411  | -0.634752 |
| 4                | 7                | 0              | -0.120277               | 1.050404  | 0.298273  |
| 5                | 1                | 0              | 1.424516                | 0.781229  | -0.842068 |
| 6                | 8                | 0              | 2.298327                | 0.719523  | -1.298936 |
| 7                | 1                | 0              | 2.103723                | 0.561146  | -2.234873 |
| 8                | 1                | 0              | 3.174031                | -0.614234 | -0.376328 |
| 9                | 8                | 0              | 3.381605                | -1.363445 | 0.223584  |
| 10               | 1                | 0              | 4.312418                | -1.263537 | 0.469184  |
| 11               | 6                | 0              | -2.465918               | -1.781536 | -0.237078 |
| 12               | 1                | 0              | -2.500336               | -2.684244 | 0.382198  |
| 13               | 1                | 0              | -3.333801               | -1.157316 | -0.025143 |
| 14               | 1                | 0              | -2.502348               | -2.078000 | -1.295652 |
| 15               | 6                | 0              | -0.037197               | -1.878440 | 0.125531  |
| 16               | 1                | 0              | -0.005672               | -2.536876 | -0.753804 |
| 17               | 1                | 0              | 0.873030                | -1.284896 | 0.129330  |
| 18               | 1                | 0              | -0.041244               | -2.510570 | 1.022545  |

-----

|    |   |   |           |           |           |
|----|---|---|-----------|-----------|-----------|
| 19 | 6 | 0 | -0.238777 | 2.488050  | -0.007615 |
| 20 | 1 | 0 | -1.013278 | 2.971549  | 0.602666  |
| 21 | 1 | 0 | 0.728580  | 2.958298  | 0.191478  |
| 22 | 1 | 0 | -0.498851 | 2.625462  | -1.057595 |
| 23 | 6 | 0 | 0.323066  | 0.848915  | 1.693485  |
| 24 | 1 | 0 | 1.318723  | 1.285313  | 1.815500  |
| 25 | 1 | 0 | -0.367519 | 1.341186  | 2.395220  |
| 26 | 1 | 0 | 0.383187  | -0.207819 | 1.946035  |

-----  
B3LYP/6-31+G\* energy: -535.188554 Hartree

Zero-point vibrational energy: 0.225887 Hartree

Thermal correction to Gibbs free energy: 0.181454 Hartree

B3LYP/6-31++G\*\*//B3LYP/6-31+G\* energy: -535.4076102 Hartree

B3LYP/6-311++G\*\*//B3LYP/6-31+G\* energy: -535.5385568 Hartree

B3LYP/aug-cc-pVDZ//B3LYP/6-31+G\* energy: -535.4404007 Hartree

B3LYP/ aug-cc-pVTZ //B3LYP/6-31+G\* energy: -535.5843945 Hartree

MP2/6-31+G\* //B3LYP/6-31+G\* energy: -533.7108106 Hartree

MP2/6-31++G\*\* //B3LYP/6-31+G\* energy: -533.8525861 Hartree

MP2/6-311++G\*\* //B3LYP/6-31+G\* energy: -534.0682379 Hartree

MP2/6-311++G(2d,2p)//B3LYP/6-31+G\* energy: -534.0222697 Hartree

MP2/aug-cc-pVDZ //B3LYP/6-31+G\* energy: -533.9676158Hartree

MP2/aug-cc-pVTZ //B3LYP/6-31+G\* energy: -534.4471616Hartree

MP2/aug-cc-pVQZ //B3LYP/6-31+G\* energy: -534.6001791 Hartree

MP2/CBS //B3LYP/6-31+G(d) energy: -534.6870141 Hartree

CCSD(T)/6-31++G\*\*// B3LYP /6-31+G\* energy: -533.9872021 Hartree

CCSD(T)/aug-cc-pVDZ// B3LYP /6-31+G\* energy: -534.1151401 Hartree

Solvent shift(FPCM/0.001 au contour): -0.015876977 Hartree

### TS-e in Figure 6:

Standard orientation:

-----

| Center<br>Number | Atomic<br>Number | Atomic<br>Type | Coordinates (Angstroms) |           |           |
|------------------|------------------|----------------|-------------------------|-----------|-----------|
|                  |                  |                | X                       | Y         | Z         |
| 1                | 6                | 0              | 0.479395                | -0.598034 | -0.332527 |
| 2                | 7                | 0              | 1.427126                | 0.102613  | 0.381350  |
| 3                | 8                | 0              | 0.718974                | -1.534935 | -1.068543 |
| 4                | 7                | 0              | -0.924701               | -0.607046 | 0.354459  |
| 5                | 1                | 0              | -1.281479               | 0.375422  | 0.438209  |
| 6                | 8                | 0              | -1.839436               | 2.037676  | 0.208612  |
| 7                | 1                | 0              | -2.740332               | 2.246553  | -0.077772 |
| 8                | 1                | 0              | -1.270913               | 1.850616  | -0.657903 |
| 9                | 8                | 0              | -0.430703               | 0.998429  | -1.536729 |
| 10               | 1                | 0              | 0.154226                | 1.325955  | -2.234959 |
| 11               | 6                | 0              | 2.796702                | -0.072700 | -0.105533 |

-----

|    |   |   |           |           |           |
|----|---|---|-----------|-----------|-----------|
| 12 | 1 | 0 | 3.486604  | 0.231945  | 0.687238  |
| 13 | 1 | 0 | 2.967569  | -1.118925 | -0.358578 |
| 14 | 1 | 0 | 2.986864  | 0.542010  | -0.998252 |
| 15 | 6 | 0 | 1.178634  | 1.427934  | 0.948624  |
| 16 | 1 | 0 | 1.299991  | 2.208525  | 0.187630  |
| 17 | 1 | 0 | 0.171329  | 1.526984  | 1.350751  |
| 18 | 1 | 0 | 1.895588  | 1.590439  | 1.760909  |
| 19 | 6 | 0 | -1.900811 | -1.305848 | -0.537810 |
| 20 | 1 | 0 | -1.614964 | -2.353165 | -0.629901 |
| 21 | 1 | 0 | -2.891171 | -1.207999 | -0.085952 |
| 22 | 1 | 0 | -1.853532 | -0.806310 | -1.504420 |
| 23 | 6 | 0 | -0.864189 | -1.237727 | 1.705102  |
| 24 | 1 | 0 | -1.871127 | -1.252874 | 2.129499  |
| 25 | 1 | 0 | -0.486674 | -2.257323 | 1.602035  |
| 26 | 1 | 0 | -0.198014 | -0.661921 | 2.346947  |

-----  
B3LYP/6-31+G\* energy: -535.127862 Hartree

Zero-point vibrational energy: 0.226244 Hartree

Thermal correction to Gibbs free energy: 0.187873 Hartree

B3LYP/6-31++G\*\*//B3LYP/6-31+G\* energy: -535.3521202 Hartree

B3LYP/6-311++G\*\*//B3LYP/6-31+G\* energy: -535.482388 Hartree

B3LYP/aug-cc-pVDZ//B3LYP/6-31+G\* energy: -535.3848094 Hartree

B3LYP/ aug-cc-pVTZ //B3LYP/6-31+G\* energy: -535.5269789 Hartree

MP2/6-31+G\* //B3LYP/6-31+G\* energy: -533.6623746 Hartree

MP2/6-31++G\*\* //B3LYP/6-31+G\* energy: -533.8024414 Hartree

MP2/6-311++G\*\* //B3LYP/6-31+G\* energy: -534.0154312 Hartree

MP2/6-311++G(2d,2p)//B3LYP/6-31+G\* energy: -534.1514769 Hartree

MP2/aug-cc-pVDZ //B3LYP/6-31+G\* energy: -533.92005Hartree

MP2/aug-cc-pVTZ //B3LYP/6-31+G\* energy: -534.3966379Hartree

MP2/aug-cc-pVQZ //B3LYP/6-31+G\* energy: -534.548375 Hartree

MP2/CBS //B3LYP/6-31+G(d) energy: -534.6344476 Hartree

CCSD(T)/6-31++G\*\*// B3LYP /6-31+G\* energy: -533.9348143 Hartree

CCSD(T)/aug-cc-pVDZ// B3LYP /6-31+G\* energy: -534.0655751 Hartree

Solvent shift(FPCM/0.001 au contour): -0.026446037 Hartree

### PC-e in Figure 6:

Standard orientation:

| Center<br>Number | Atomic<br>Number | Atomic<br>Type | Coordinates (Angstroms) |           |           |
|------------------|------------------|----------------|-------------------------|-----------|-----------|
|                  |                  |                | X                       | Y         | Z         |
| 1                | 6                | 0              | -2.236317               | 0.288995  | 0.209325  |
| 2                | 7                | 0              | -1.653861               | -0.761008 | -0.408801 |
| 3                | 8                | 0              | -3.060066               | 0.248915  | 1.112757  |

|    |   |   |           |           |           |
|----|---|---|-----------|-----------|-----------|
| 4  | 7 | 0 | 2.531695  | -0.294259 | 0.123389  |
| 5  | 1 | 0 | 2.146918  | 0.650466  | 0.160722  |
| 6  | 8 | 0 | 0.963096  | 2.389867  | 0.095227  |
| 7  | 1 | 0 | 1.123301  | 3.165711  | -0.461643 |
| 8  | 1 | 0 | 0.045246  | 2.110872  | -0.087706 |
| 9  | 8 | 0 | -1.813394 | 1.513204  | -0.293285 |
| 10 | 1 | 0 | -2.355747 | 2.163248  | 0.188641  |
| 11 | 6 | 0 | -1.900316 | -2.103484 | 0.105763  |
| 12 | 1 | 0 | -0.965658 | -2.541442 | 0.478375  |
| 13 | 1 | 0 | -2.625928 | -2.049633 | 0.916669  |
| 14 | 1 | 0 | -2.293872 | -2.743256 | -0.693721 |
| 15 | 6 | 0 | -0.661626 | -0.643699 | -1.479024 |
| 16 | 1 | 0 | -0.852833 | -1.433508 | -2.214590 |
| 17 | 1 | 0 | -0.759175 | 0.320811  | -1.976568 |
| 18 | 1 | 0 | 0.357174  | -0.754082 | -1.083451 |
| 19 | 6 | 0 | 2.881720  | -0.734425 | 1.469774  |
| 20 | 1 | 0 | 3.160775  | -1.796024 | 1.450877  |
| 21 | 1 | 0 | 3.726542  | -0.173941 | 1.915072  |
| 22 | 1 | 0 | 2.014552  | -0.624700 | 2.129774  |
| 23 | 6 | 0 | 3.668134  | -0.323391 | -0.789959 |
| 24 | 1 | 0 | 4.541413  | 0.257874  | -0.434292 |
| 25 | 1 | 0 | 3.998543  | -1.359855 | -0.937333 |
| 26 | 1 | 0 | 3.367256  | 0.074489  | -1.765813 |

-----  
B3LYP/6-31+G\* energy: -535.195556 Hartree

Zero-point vibrational energy: 0.226233 Hartree

Thermal correction to Gibbs free energy: 0.178222 Hartree

B3LYP/6-31++G\*\*//B3LYP/6-31+G\* energy: -535.4086347 Hartree

B3LYP/6-311++G\*\*//B3LYP/6-31+G\* energy: -535.539609 Hartree

B3LYP/aug-cc-pVDZ//B3LYP/6-31+G\* energy: -535.4405035 Hartree

B3LYP/ aug-cc-pVTZ //B3LYP/6-31+G\* energy: -535.5869776 Hartree

MP2/6-31+G\* //B3LYP/6-31+G\* energy: -533.7033275 Hartree

MP2/6-31++G\*\* //B3LYP/6-31+G\* energy: -533.8433137 Hartree

MP2/6-311++G\*\* //B3LYP/6-31+G\* energy: -534.0585253 Hartree

MP2/6-311++G(2d,2p)//B3LYP/6-31+G\* energy: -534.0149259 Hartree

MP2/aug-cc-pVDZ //B3LYP/6-31+G\* energy: -533.9550502Hartree

MP2/aug-cc-pVTZ //B3LYP/6-31+G\* energy: -534.4372105Hartree

MP2/aug-cc-pVQZ //B3LYP/6-31+G\* energy: -534.5909248 Hartree

MP2/CBS //B3LYP/6-31+G(d) energy: -534.6781419 Hartree

CCSD(T)/6-31++G\*\*// B3LYP /6-31+G\* energy: -533.9800121 Hartree

CCSD(T)/aug-cc-pVDZ// B3LYP /6-31+G\* energy: -534.1049951 Hartree

Solvent shift (FPCM/0.001 au contour): -0.018076818 Hartree

**Table S1.** Calculated Gibbs free energy barriers (in kcal/mol) for various reaction pathways of the hydrolysis of urea and Me<sub>4</sub>U in both the gas phase and aqueous solution at 298.15 K.<sup>a</sup>

| Theoretical level               | Urea hydrolysis |                |                |                | Me <sub>4</sub> U hydrolysis |                |
|---------------------------------|-----------------|----------------|----------------|----------------|------------------------------|----------------|
|                                 | Alkaline        | APOE           | One-water APNE | Two-water APNE | Alkaline                     | Two-water APNE |
| B3LYP/6-31+G*                   | 46.4<br>(29.1)  | 59.1<br>(56.2) | 45.4<br>(50.0) | 41.3<br>(45.6) | 46.2<br>(27.7)               | 31.5<br>(38.0) |
| B3LYP/6-31++G**                 | 48.7<br>(31.3)  | 60.4<br>(55.9) | 46.3<br>(51.0) | 42.7<br>(47.0) | 47.7<br>(29.2)               | 32.2<br>(38.8) |
| B3LYP/6-311++G**                | 50.8<br>(33.4)  | 63.0<br>(58.5) | 47.1<br>(51.7) | 43.3<br>(47.6) | 49.4<br>(30.9)               | 32.6<br>(39.3) |
| B3LYP/aug-cc-pVDZ               | 49.9<br>(32.5)  | 60.7<br>(56.2) | 46.4<br>(51.0) | 43.2<br>(47.5) | 48.0<br>(29.5)               | 32.3<br>(38.9) |
| B3LYP/aug-cc-pVTZ               | 52.4<br>(35.0)  | 63.8<br>(59.3) | 48.5<br>(53.2) | 45.0<br>(49.3) | 52.6<br>(34.1)               | 33.4<br>(40.1) |
| MP2/6-31+G*                     | 37.8<br>(20.4)  | 57.1<br>(54.2) | 46.3<br>(50.9) | 40.6<br>(44.8) | 35.3<br>(17.4)               | 27.8<br>(34.4) |
| MP2/6-31++G**                   | 39.8<br>(22.4)  | 58.3<br>(53.8) | 47.5<br>(52.2) | 42.3<br>(46.6) | 36.5<br>(18.6)               | 28.9<br>(35.5) |
| MP2/6-311++G**                  | 41.3<br>(23.9)  | 57.0<br>(54.1) | 48.8<br>(53.5) | 43.9<br>(48.2) | 37.5<br>(19.6)               | 30.5<br>(37.2) |
| MP2/6-311++G(2d,2p)             | 41.5<br>(24.1)  | 57.8<br>(55.0) | 48.0<br>(52.7) | 42.9<br>(47.1) | 38.6<br>(20.7)               | 30.2<br>(36.8) |
| MP2/aug-cc-pVDZ                 | 38.7<br>(21.2)  | 56.6<br>(52.1) | 45.7<br>(50.4) | 41.0<br>(45.3) | 35.6<br>(17.7)               | 27.2<br>(33.9) |
| MP2/aug-cc-pVTZ                 | 39.5<br>(22.1)  | 56.7<br>(52.2) | 46.8<br>(51.4) | 41.9<br>(46.2) | 38.2<br>(20.3)               | 29.1<br>(35.7) |
| MP2/aug-cc-pVQZ                 | 40.7<br>(23.3)  | 57.0<br>(52.5) | 47.2<br>(51.9) | 42.4<br>(46.7) | 39.6<br>(21.6)               | 29.9<br>(36.5) |
| MP2/CBS                         | 41.5<br>(24.1)  | 57.3<br>(52.8) | 47.4<br>(52.1) | 42.7<br>(47.0) | 40.4<br>(22.4)               | 30.4<br>(37.0) |
| CCSD(T)/6-31++G*                | 39.2<br>(21.8)  | 58.2<br>(53.7) | 48.9<br>(53.6) | 43.8<br>(48.1) | 34.6<br>(16.7)               | 30.3<br>(36.9) |
| CCSD(T)/aug-cc-pVDZ             | 38.1<br>(20.7)  | 56.5<br>(52.0) | 47.0<br>(51.7) | 42.4<br>(46.7) | 33.9<br>(16.0)               | 28.5<br>(35.1) |
| Best estimate <sup>b</sup>      | 40.9<br>(23.5)  | 57.2<br>(52.7) | 48.7<br>(53.4) | 44.1<br>(48.4) | 38.7<br>(20.7)               | 31.7<br>(38.2) |
| Experimental value <sup>c</sup> | Uncertain       |                |                |                | 32.9                         |                |

<sup>a</sup>All energy calculations were performed by using the geometries optimized in the gas phase at the B3LYP/6-31+G\* level. The obtained free energy barriers were based on the single-point energy calculations at various levels, plus the zero-point vibration and thermal corrections calculated at the B3LYP/6-31+G\* level and the solvent shifts calculated at the

HF/6-31+G\* level (using the default 0.001 a.u. contour). Values given in the parentheses are the Gibbs free energy barriers calculated in the gas phase.

<sup>b</sup>The best estimate was the extrapolated MP2/CBS value plus the shift from the MP2/aug-cc-pVDZ value to the corresponding CCSD(T)/aug-cc-pVDZ value.

<sup>c</sup>Experimental value from literature (B. P. Callahan, Y. Yuan and R. Wolfenden, *J. Am. Chem. Soc.*, 2005, 127, 10828).

**Table S2.** Imaginary vibrational frequencies for the rate-determining transition states, tunneling factor (transmission coefficient), and rate constants for urea and Me<sub>4</sub>U hydrolysis at 298.15 K.

|                                                   | Urea hydrolysis       |                       |                       |                       | Me <sub>4</sub> U hydrolysis |                       |
|---------------------------------------------------|-----------------------|-----------------------|-----------------------|-----------------------|------------------------------|-----------------------|
|                                                   | Alkaline              | APOE                  | One-water APNE        | Two-water APNE        | Alkaline                     | Two-water APNE        |
|                                                   | TS2-a                 | TS2-b                 | TS-c1                 | TS-c2                 | TS1-d                        | TS-e                  |
| Imaginary frequency ( <i>i</i> cm <sup>-1</sup> ) | -460.93               | -1679.52              | -629.51               | -239.08               | -221.31                      | -189.54               |
| <i>g</i> (tunneling factor) <sup>a</sup>          | 1.21                  | 3.75                  | 1.39                  | 1.06                  | 1.05                         | 1.03                  |
| <i>k</i> (298.15K, s <sup>-1</sup> ) <sup>b</sup> | 6.0×10 <sup>-18</sup> | 1.9×10 <sup>-29</sup> | 1.3×10 <sup>-23</sup> | 2.3×10 <sup>-20</sup> | 2.2×10 <sup>-16</sup>        | 3.0×10 <sup>-11</sup> |

<sup>a</sup>  $g = 1 - (ih\nu^\ddagger/RT)^2/24$ , see references 1-2.

<sup>b</sup>  $k = g(k_b T/h) \exp(\Delta S_m^\ddagger/R - \Delta H_m^\ddagger/RT)$ , see references 1-2.

## References

1. W. Si and S. Zhuo, *Indian Journal of Chemistry*, 2008, 47A, 560-564.
2. E. Wigner, *Z. Phys. Chem. B.*, 1932, 19, 203.
